Itakura *et al.* 2018-11-21

1 Trynity controls epidermal barrier function and respiratory tube  
2 maturation in *Drosophila* by modulating apical extracellular matrix  
3 nano-patterning.

4

5 Yuki Itakura<sup>1</sup>, Sachi Inagaki<sup>3</sup>, Housei Wada<sup>1</sup> and Shigeo Hayashi<sup>1, 2, \*</sup>

6 <sup>1</sup> Laboratory for Morphogenetic Signaling, RIKEN Center for Biosystems

7 Dynamics Research, 2-2-3 Minatojima-minamimachi, Chuo-ku, Kobe, Hyogo,

8 650-0047, Japan

9 <sup>2</sup> Department of Biology, Kobe University Graduate School of Science, 1-1

10 Rokkodai-cho, Nada-ku, Kobe, Hyogo, 657-8051, Japan

11 <sup>3</sup> Biosignal Research Center, Kobe University, 1-1 Rokkodai, Nada, Kobe 657-

12 8501, JAPAN.

13

14 \*Correspondence to:

15 Shigeo Hayashi

16 RIKEN Center for Biosystems Dynamics Research

17 2-2-3 Minatojima-minamimachi, Chuo-ku Kobe 650-0047

18 Japan

19 Tel: 81-78-306-3185; Fax: 81-78-306-3183

20 E-mail: [shayashi@cdb.riken.jp](mailto:shayashi@cdb.riken.jp)

Itakura *et al.* 2018-11-21

21

22 **Running title:** ZP protein function in the cuticle of *Drosophila*

23

24 **Key words:** aECM, ZP domain protein, organogenesis, epidermis, trachea

25

26 **Summary Statement**

27 The zona pellucida domain protein Trynity controls the structural organization

28 and function of the apical extracellular matrix in the epidermis and trachea of

29 *Drosophila*.

Itakura *et al.* 2018-11-21

30 **Abstract**

31 The outer surface of insects is covered by the cuticle, which is derived from the  
32 apical extracellular matrix (aECM). The aECM is secreted by epidermal cells  
33 during embryogenesis. The aECM exhibits large variations in structure, function,  
34 and constituent molecules, reflecting the enormous diversity in insect  
35 appearances. To investigate the molecular principles of aECM organization and  
36 function, here we studied the role of a conserved aECM protein, the ZP domain  
37 protein Trynity, in *Drosophila melanogaster*. We first identified *trynity* as an  
38 essential gene for epidermal barrier function. *trynity* mutation caused  
39 disintegration of the outermost envelope layer of the cuticle, resulting in small-  
40 molecule leakage and in growth and molting defects. In addition, the tracheal  
41 tubules of *trynity* mutants showed defects in pore-like structures of the cuticle,  
42 and the mutant tracheal cells failed to absorb luminal proteins and liquid. Our  
43 findings indicated that *trynity* plays essential roles in organizing nano-level  
44 structures in the envelope layer of the cuticle that both restrict molecular  
45 trafficking through the epidermis and promote the massive absorption pulse in

Itakura *et al.* 2018-11-21

46 the trachea.

47

## 48 **Introduction**

49 The skin is one of the largest organs of the body, with various functions  
50 including body temperature regulation [1] and sensory-information detection [2],  
51 along with its role as a barrier protecting the internal organs from the external  
52 environment. The barrier function is provided by the epidermis, which consists  
53 of multiple layers: the epidermal cell, stratum corneum, and sebum layers. The  
54 outer two layers are non-cellular structures that prevent the entry of external  
55 agents such as microbes, viruses, and chemicals, and maintain moisture in the  
56 skin [3-5]. Pathogenic conditions that disorganize those layers allow the  
57 invasion of external agents through the skin and cause a loss of moisture,  
58 resulting in dry skin, asteatosis, and atopic dermatitis [6]. In insects, the body is  
59 covered with cuticle layers: the envelope, epicuticle, and procuticle [7]. The  
60 cuticle is produced by epidermal cells and provides the barrier function. In both  
61 the skin epidermis and cuticle systems, the outermost layers are rich in lipid.  
62 The inner layers of the vertebrate epidermis are rich in keratin-family proteins,

Itakura *et al.* 2018-11-21

63 while the insect epicuticle and procuticle are rich in proteins and polysaccharide  
64 chitin, respectively. Thus, these systems share functional and structural  
65 similarities.

66 ZP domain proteins were first identified as structural components of the  
67 zona pellucida, the mammalian egg coat [8]. ZP domains are typically ~260  
68 residues long, divided into N-terminal and C-terminal halves with conserved  
69 cysteine residues [9], and act as protein-oligomerization modules in the  
70 formation of filaments and matrices [10]. ZP domain proteins are reported to  
71 function in mammalian-egg fertilization, body-shape regulation, and mammalian  
72 auditory-organ formation [reviewed in [11] and [9]].

73 Twenty ZP domain proteins have been identified in the genome of  
74 *Drosophila melanogaster* [12,13], among which *dumpy* (*dpy*) and *piopio* (*pio*)  
75 play critical roles in the morphological development of the trachea, wing, and  
76 notum [14-16]. In these processes, the ZP domain proteins serve as an  
77 anchoring structure that stabilizes the apical plasma membrane of the  
78 epidermal tissues undergoing morphogenetic movement [15-18]. ZP proteins

Itakura *et al.* 2018-11-21

79 also function to shape the denticles, actin-rich apical protrusions in the larval  
80 epidermis, by differentially distributing to specific subcellular locations [13].  
81 However, the ZP protein functions are still incompletely understood, in part  
82 because many of the available mutant alleles are caused by transposon  
83 insertions or large chromosomal deletions. Thus, as a first step toward  
84 comprehensively understanding the ZP domain proteins, we performed a  
85 systematic mutagenesis of ZP domain proteins in *Drosophila* using the  
86 CRISPR/Cas9 genome editing technique (Itakura *et al.*, unpublished). Here we  
87 focus on the ZP protein encoded by *trynity* (*tyn*), which was previously  
88 implicated in denticle morphogenesis [13]. While this work was in its final stage,  
89 it was reported that *tyn* mutants show abnormal feeding behavior and  
90 incomplete respiratory-system maturation [19]. The authors suggested that  
91 these phenotypes could be explained, in part, by defects of the valve structure  
92 of the posterior spiracle. However, previous studies of this gene must be  
93 interpreted with caution, because the *tyn* mutant allele were an intronic P-  
94 element insertion [*tyn*<sup>PG38</sup> in [20] and [19]] or imprecise excisions of the same P

Itakura *et al.* 2018-11-21

95 element [*tyn*<sup>ex35</sup> in [13]]. Thus, it was possible that the phenotypes described in  
96 these studies did not represent the loss of *Tyn* function. Here we used  
97 molecularly defined *tyn* null mutations, and demonstrated new roles of *tyn* in the  
98 epidermal barrier function and maturation of tracheae that would explain the  
99 abnormal feeding behavior, growth retardation, and larval lethality of these  
100 mutants. We demonstrated by transmission electron microscopic analyses that  
101 *tyn* is required for the formation of the outermost envelope layer of the  
102 epidermal cuticle and of pore-like structures in the tracheal cuticle. These  
103 results revealed novel functions of *tyn* in constructing nano-level apical  
104 extracellular matrix (aECM) ultrastructures.

105

## 106 **Materials and Methods**

### 107 **Fly strains**

108 Flies were maintained at 25 °C. For experiments, adult flies were kept in a vial  
109 containing yeast paste on an agar plate overnight. To test viability, 50 L1 larvae  
110 on the plate were transferred to a new vial with food, and the number of pupae

Itakura *et al.* 2018-11-21

111 was counted 7 days later. This process was repeated twice for each genotype.  
112 To use embryos or newly hatched larvae for experiments, eggs on the plate  
113 were collected, dechorionated in bleach, washed, and kept on a plate with filter  
114 paper soaked in water to prevent drying. The dechorionated embryos and  
115 hatched larvae at later stages were used. The strains were:  $y^2$ ,  $cho^2$ ,  $v^1$ ;  
116 *attP40{nos-Cas9}/CyO* (NIG: CAS-0001),  $y^1, w^{67c23}/P\{w+mC=Act-$   
117 *GFP\}, Dp(1;y)y+* (DGRC:109661),  $y^1, w^*$ ,  $baz^4, P\{w[+mW.hs]=FRT(w^{hs})\}9-$   
118 *2/FM7c, P\{Dfd-GMR-nvYFP\}1, sn^+* (BDSC:23229),  $w^*$ ;  $P\{w[+mC]=His2Av-$   
119 *mRFP1\}II.2* (BDSC:23651),  $y, w, baz^4, FRT/FM7c, Dfd-GMR-YFP; btl-$   
120 *Gal4, UAS-Serp-CBD-GFP, UAS-p120-tagRFP/CyO, Dfd-YFP* [21,22] and  
121 Oregon R (laboratory Stock).

122

### 123 **CRISPR/Cas9 mutant generation**

124 To obtain *tyn* frameshift mutants, we designed a gRNA using a web resource,  
125 CRISPR Optimal Target Finder



Itakura *et al.* 2018-11-21

126 (<http://tools.flycrispr.molbio.wisc.edu/targetFinder/>) [23] and picked a sequence  
127 with a “GG” followed by “NGG” protospacer adjacent motif (PAM) sequence [24]  
128 and no off-target matches. The 20-bp target sequence and complementary  
129 oligonucleotides with 4-bp overhangs on each end, 5’-  
130 CTTGCGCTCATGGTTCAAATAGG-3’ and 5’-  
131 AAACCCTATTTGAACCATGAGCGC-3’, were annealed and cloned into a *BbsI*-  
132 digested gRNA expression vector pBFv-U6.2. This vector was injected into  
133 embryos with a genotype of  $y^2$ ,  $cho^2$ ,  $v^1$ ;  $attP40\{nos-Cas9\}/CyO$  using a  
134 standard microinjection procedure. Each of 10 founder males was crossed with  
135  $y^1$ ,  $w^*$ ,  $baz^4$ ,  $P\{w[+mW.hs]=FRT(w^{hs})\}9-2/FM7c$ ,  $P\{Dfd-GMR-nvYFP\}1$ ,  $sn^+$ , and  
136 ~100 independent candidate mutant lines were established. Eleven lines were  
137 subjected to a heteroduplex mobility assay (HMA) in 15% acrylamide gel [25],  
138 and three of these lines showed a mobility shift. Sequencing revealed two lines  
139 with a deletion and consequent stop codon ( $tyn^1$  and  $tyn^2$ ) and 1 line with a 5-bp  
140 replacement. The primers used for HMA were: 5’-  
141 GGATCATAAGACCCTGCCCG-3’, 5’-TGGTGATCCAGCTCCCAAAC-3’, and

Itakura *et al.* 2018-11-21

142 for sequencing: 5'-CCGAAGAGAAGGTTGCCCAA-3', 5'-  
143 TGCGGGTTAAGTTGGTCAGG-3'. We also picked one established line with no  
144 mutation as a control.

145

## 146 **Histology**

147 For cuticle preparations, larvae were placed on a glass slide with Hoyer's  
148 medium and lactic acid (Wako) 1:1 and cover glass, and incubated at 60-65 °C  
149 overnight. Images were obtained with an Axioplan2 (Zeiss) and DP74 camera  
150 (Olympus). Eosin staining was performed with a modified protocol of Zuber *et*  
151 *al.* [26]. Intact L1 larvae were incubated in 0.5% Eosin Y staining solution  
152 (Sigma-Aldrich) for 1 hour at 40 °C and washed with water. After heat fixation at  
153 70 °C for ~1 min [27], the larvae were observed with a VHX-6000 digital  
154 microscope (Keyence). For the DAPI penetration test, DAPI (Sigma) in water (1  
155 µg/ml) was applied to intact larvae in 50 µl of PBS [10X Phosphate-Buffered  
156 Saline (Nacalai Tesque) diluted with water] and washed out 5 min later. To

Itakura *et al.* 2018-11-21

157 image the DAPI-immersed larvae or larvae expressing Serp-CBD-GFP and  
158 p120-tagRFP for the protein clearance test, the samples were mounted in  
159 glycerol, fixed by heating, and observed with a Fluoview FV1000 confocal  
160 microscope (Olympus).

161

## 162 **Physiological tests**

163 To examine the effects of low osmotic pressure, dechorionated embryos were  
164 placed in water overnight. We picked 10 larvae for each genotype and  
165 calculated the survival rate and relative body lengths of the surviving larvae  
166 normalized to the median obtained for Oregon R. Since high osmotic pressure  
167 caused rapid changes, 10 hatched larvae were collected in 5  $\mu$ l PBS, and 20  $\mu$ l  
168 10X PBS was added. Thirty minutes later, images were captured and survival  
169 rates were calculated.

170

## 171 **In situ hybridization**

Itakura *et al.* 2018-11-21

172 Because the probe used previously [12] (1082-bases long) showed relatively  
173 high background signals in our experiments, we designed a new probe that was  
174 356-bases long. This new probe detected the *tyn* mRNA expression in a pattern  
175 similar to that reported previously, but the lower background enabled us to  
176 detect signals in the tracheal system more clearly. The digoxigenin-labeled  
177 RNA probe was synthesized with T7 RNA polymerase and a template amplified  
178 with the primers 5'-GGCGGCCTTTAGTTTTGTGG-3' and 5'-  
179 TAATACGACTCACTATAGGGGTCCAGAGCTGCGTCTATCC-3' (with T7  
180 promotor) followed by gel filtration. Whole-mount *in situ* hybridization was  
181 performed as described previously [28]. Embryos were mounted in 80%  
182 glycerol, observed using a BX53 upright microscope with DIC optics, and  
183 photographed with a DP74 digital camera (Olympus).

184

185 **Time-lapse Imaging**

Itakura *et al.* 2018-11-21

186 To observe feeding behavior, 10 larvae were placed in each well of a 96-well  
187 plate with agar, and yeast paste was applied to the center of each well. Time-  
188 lapse imaging was then performed at 15-sec intervals, for a total of 2 hours.  
189 Immobile larvae were excluded. The percentages of larvae inside, peripheral to,  
190 and outside the paste were plotted against time after the paste was applied. For  
191 live imaging of the gas-filling process, stage-17 embryos with visible malpighian  
192 tubules and slightly pigmented mouth cuticle, most of which should enter the  
193 stage of tracheal liquid-gas transition within an hour, were picked and placed on  
194 a plate with heptane glue (heptane with sticky tape) and covered with water.  
195 Images were obtained every 30 sec. for 6 hours. For both imaging experiments,  
196 a Digital Microscope VHX-6000 (Keyence) was used.

197

#### 198 **Transmission electron microscopy**

199 The TEM protocol was modified from a previously described procedure [29].  
200 Dechorionated embryos at the same stage as those used for live imaging of the

Itakura *et al.* 2018-11-21

201 liquid-gas transition were placed on sticky tape attached to a glass slide, poked  
202 out from the vitelline membrane in fixation solution (2% paraformaldehyde, 2%  
203 glutaraldehyde, 1xPBS, 1 mM CaCl<sub>2</sub>, 1.5% DMSO, pH=7.4), transferred to fresh  
204 fixation solution, and further incubated for 2 hours in total. The embryos were  
205 washed with PBS, embedded in 3% agarose, and cut out as agarose cubes  
206 containing an embryo to make the following processes easier. After the  
207 subsequent fixation (2% OsO<sub>4</sub>, 1x PBS, 0.2 M sucrose) on ice for 2 hours and  
208 dehydration with a graded series of ethanol in water (30% and 50% on ice,  
209 70%, 80%, 90%, 95%, 99.5%, 100% 3 times, at room temperature, 15 min for  
210 each), the embryos were embedded in resin (propylene oxide for 20 min twice,  
211 propylene oxide-resin 1:1 for 1 hour, 1:3 overnight, 100% resin for 3 hours  
212 twice, and overnight under vacuum) and incubated at 60 °C for polymerization.  
213 Ultrathin 80-nm-thick sections were obtained and stained with heavy metal.  
214 Images were captured with a JEM-1400 (JEOL). Three embryos each for *y*<sup>2</sup>,  
215 *cho*<sup>2</sup>, *v*<sup>1</sup> and *tyn*<sup>1</sup>, *y*<sup>2</sup>, *cho*<sup>2</sup>, *v*<sup>1</sup> were examined.

216

Itakura *et al.* 2018-11-21

217 **Results**

218 ***tyn* mutants exhibit growth and behavioral defects.**

219 Trynity has three PAN/Apple domains followed by a ZP domain and a  
220 transmembrane domain (Fig. 1A). We mutagenized *tyn* using the CRISPR/Cas9  
221 technique [30,31] by targeting the guide RNA to the sequence encoding the  
222 third PAN/Apple domain (Fig. 1A, arrowhead). Two independent mutations with  
223 small deletions that resulted in a frameshift and a stop codon were isolated (*tyn*<sup>1</sup>  
224 and *tyn*<sup>2</sup>, Fig.1A). The two mutations were lethal as hemizygous, homozygous,  
225 and trans-heterozygous conditions, and this lethality was rescued by a  
226 chromosomal duplication carrying the *tyn* locus (Materials and Methods). In the  
227 following experiments, we used *tyn* stocks balanced with *FM7-dfd-YFP*, and  
228 progenies lacking the *dfd-YFP* signal (*tyn* homozygotes and hemizygotes) were  
229 used as mutants, while animals with the *dfd-YFP* signal were used as sibling  
230 controls. We also used the Oregon R strain, and another control line, *y*<sup>2</sup>,*cho*<sup>2</sup>,*v*<sup>1</sup>,  
231 which carries a normal *tyn* sequence obtained from the same progeny that  
232 yielded *tyn*<sup>1</sup> and *tyn*<sup>2</sup>, as controls.

Itakura *et al.* 2018-11-21

233

234 **Figure 1.** *tyn* mutants and their gross phenotypes. (A) Tyn protein structure and

235 *tyn* DNA sequence of the region including the CRISPR/Cas9 target site. Tyn

236 has 3 PAN/Apple domains, a ZP domain, and a transmembrane domain. The

237 target site is indicated by an arrowhead in the diagram, and the sequence is

238 underlined. *tyn*<sup>1</sup> and *tyn*<sup>2</sup> contained 23- and 4-base deletions respectively,

239 which resulted in early stop codons (red letters). (B) Larval body size for each

240 genotype. Day 1 means ~24 hours after hatching. On days 2 and 3, the *tyn*

241 mutants remained small, while control larvae (Oregon R and *y*<sup>2</sup>, *cho*<sup>2</sup>, *v*<sup>1</sup>) grew

242 larger. (C) On day 3, the *tyn*<sup>1</sup> mutant larvae lacked anterior spiracles, while

243 those of Oregon R were obvious (arrowheads). (D) Larval viability of each

244 genotype. n=100 for each. (E) Photographs of larvae with yeast paste.

245 Arrowheads indicate larvae that stayed at the periphery of the yeast paste

246 without entering it. In the left panel, there were 5 larvae within the food. The

247 quantified data are shown in (F). n=15-20 for each. \*\*P<0.01, \*P<0.05 by

248 Fisher's exact test with Benjamini & Hochberg correction.



Itakura *et al.* 2018-11-21

249

250       The *tyn* mutant first-instar larvae hatched with a normal appearance, but  
251       their growth was retarded (Fig.1B). On day 3, the mutant larvae lacked anterior  
252       spiracles and their head skeletons were underdeveloped, suggesting molting  
253       failure (Fig. 1C). All of the mutants died before pupation (Fig.1D).

254       Both control and *tyn* mutant L1 larvae placed on agar plates approached  
255       distantly placed yeast food (Supplementary Fig. 1) and ingested it, as shown by  
256       gut labeling by food containing blue dye (data not shown). However, the *tyn*  
257       mutants tended to stay at the periphery of the food, while control larvae entered  
258       it (Fig. 1E, F and Supplementary Fig. 1). These defects in growth and feeding  
259       behavior, and additional defects in posterior spiracle valve formation  
260       (Supplementary Fig. 2) were similar to phenotypes reported for *tyn*<sup>PG38</sup> [19].

261

## 262       ***tyn* is essential for the epidermal barrier function**

263       We found that the *tyn*<sup>1</sup> mutants were sensitive to low osmolality. When first-  
264       instar larvae were kept in water overnight, many of the mutant larvae showed

Itakura *et al.* 2018-11-21

265 dramatic swelling of the body, whereas control larvae did not (Fig. 2A). Although  
266 the viability of the mutants was slightly lower in this condition (Fig. 2B), the body  
267 length of the surviving *tyn*<sup>1</sup> mutant larvae was 1.3-times longer than that of  
268 controls (Fig. 2C). On the other hand, incubation under high osmolarity (1 M  
269 NaCl) for 30 min. caused prominent shrinkage of the mutant larval body, and a  
270 significantly higher death rate than in the three control groups (Fig. 2D and E,  
271  $p < 0.05$ ). These observations indicated that the *tyn*<sup>1</sup> mutant larvae were  
272 sensitive to changes in the external salt concentration, suggesting that their  
273 epidermis allowed the passage of salt ions and water.

274

275 **Figure 2.** Defective barrier function against osmolarity in *tyn* mutants. First-  
276 instar *tyn*<sup>1</sup>, *y*<sup>2</sup>, *cho*<sup>2</sup>, *v*<sup>1</sup> larvae showed obvious swelling in water (A-C) and  
277 shrinkage in hyper-osmotic solution (D, E) compared with control groups, *y*<sup>2</sup>,  
278 *cho*<sup>2</sup>, *v*<sup>1</sup>, Oregon R, and *tyn*<sup>1</sup>, *y*<sup>2</sup>, *cho*<sup>2</sup>, *v*<sup>1</sup>/FM7. (A) Larvae kept in water  
279 overnight. (B) The survival rate was calculated by dividing the number of  
280 moving larvae by that of total larvae (10 larvae for each of 2 trials, average

Itakura *et al.* 2018-11-21

281 values  $\pm$  S.E.M are shown.). There was no significant difference (P=0.29 by  
282 Kruskal Wallis test). (C) Median body length normalized to that of Oregon R.  
283 \*\*\*\*P<0.0001, \*\*\*P<0.001, \*P<0.05 by Dunn's multiple comparisons test after a  
284 Kruskal-Wallis test (P<0.0001). (D) Larvae kept in high-salt solution for 30 min.  
285 (E) All 10 of the *tyn<sup>1</sup>*, *y<sup>2</sup>*, *cho<sup>2</sup>*, *v<sup>1</sup>* larvae died, while 6 of the 10 larvae survived in  
286 each of the three control groups. \*P<0.05 by Fisher's exact test with Benjamini  
287 & Hochberg correction. Scale bar: 500  $\mu$ m.

288

289 We next tested the permeability of the epidermis to larger molecules.  
290 Incubating L1 larvae in Eosin Y (molecular weight 647.89) at 40°C for 60 min.  
291 resulted in intense staining of the internal organs of *tyn<sup>1</sup>* and *tyn<sup>2</sup>* mutants but  
292 not of control larvae (Fig. 3A, *tyn<sup>2</sup>*: data not shown). In addition, incubation in  
293 DAPI (molecular weight 350.25) caused the labeling of epidermal cells and  
294 tracheal cells of *tyn<sup>1</sup>* mutants, but not of control larvae (Fig. 3B). Wang *et. al.*  
295 demonstrated that Eosin Y penetrated the tracheal lumen through permanently  
296 open spiracles in *tyn<sup>PG38</sup>* larvae, but they did not observe labeling of the tracheal

Itakura *et al.* 2018-11-21

297 cells, epidermis, or internal tissues [19]. These differences in the *tyn*<sup>1</sup> and  
298 *tyn*<sup>PG38</sup> phenotypes may reflect the different nature of the mutations. Our  
299 findings collectively indicated that in the *tyn*-null larvae, the epidermal barrier  
300 function failed and allowed external salt and small molecules to leak into the  
301 inner tissues.

302

303 **Figure 3.** Leakage of molecules through the *tyn* mutant body surface. (A) Eosin  
304 Y penetrated the body of *tyn*<sup>1</sup>, *y*<sup>2</sup>, *cho*<sup>2</sup>, *v*<sup>1</sup> larvae but not of *y*<sup>2</sup>, *cho*<sup>2</sup>, *v*<sup>1</sup>. Scale  
305 bar: 500 μm. (B) DAPI staining was observed in neither the epidermis nor  
306 trachea of the control larvae (+/+; Ubi-GAP-43GFP, His2AV-mRFP), while some  
307 of the epidermal and tracheal cells were strongly labeled with DAPI in the  
308 mutant larvae (*tyn*<sup>1</sup>, *y*<sup>2</sup>, *cho*<sup>2</sup>, *v*<sup>1</sup>; Ubi-GAP-43GFP, His2AV-mRFP). His2AV-  
309 mRFP (magenta) was expressed to visualize nuclei in all the cells. Bright-field  
310 images show that the trachea was gas-filled in the control but not in the mutant.  
311 Scale bar: 10 μm.

312

Itakura *et al.* 2018-11-21

313 **The outermost layer of the epidermis is disorganized in *tyn* mutants.**

314 To determine the cause of the decreased barrier function in *tyn* mutants, we

315 observed the epidermal structures by transmission electron microscopy (TEM).

316 Moussian *et. al.* described three major layers of the larval cuticle that are

317 distinguished by TEM: the procuticle, epicuticle, and envelope [32] (Fig. 4A, A').

318 The procuticle, which mainly consists of chitin and protein, borders the apical

319 side of the epidermal cells. The epicuticle is the next outer layer and rich in

320 proteins. The envelope is the outermost of the three layers, and contains lipids,

321 waxes, and proteins. TEM observation of *tyn*<sup>1</sup> mutants at the late stage 17 of

322 embryogenesis showed a three-layered cuticular organization indistinguishable

323 from that of controls, except for the outer layer of the envelope, which was

324 rough and disorganized compared to the smooth control envelope (Fig. 4B, B',

325 arrows indicate defective structures). Specifically, while the envelope layer of

326 control embryos consisted of five alternating electron-dense and lucid sublayers

327 (Fig. 4C), in the *tyn*<sup>1</sup> mutant the surfaces of one or two layers were broken into

328 debris (Fig. 4D).

Itakura *et al.* 2018-11-21

329

330 **Figure 4.** Ultrastructure of the epidermis in  $y^2$ ,  $cho^2$ ,  $v$  and the  $tyn^1$  mutant. (A)

331 Three cuticle layers formed on the plasma membrane of epidermal cells (PM,

332 arrowhead): the outermost envelope (Env), intermediate epicuticle (Epi), and

333 innermost procuticle (Pro). (B) The surface of the envelope layer of the  $tyn^1$

334 mutant was disorganized (arrow). (A'), (B'): Enlarged views of the region

335 indicated by a rectangle in (A) and (B), respectively. In control samples, the five

336 sublayers constituting the envelope were observed clearly, as alternating

337 electron-dense and lucid layers in (C). (D) In the  $tyn^1$  mutant, one or two surface

338 sublayers were broken in many regions (arrowheads), causing a rough surface

339 with extensive debris (arrows). Scale bar: 200 nm for (A), (B) and 50 nm for (A'),

340 (B)', (C), (D).

341

342 ***tyn* mRNA localizes to the epidermis, trachea, and other organs**

343 We next performed whole-mount embryonic *in situ* hybridization analysis with a

344 newly designed RNA probe for *tyn* (see Materials and Methods). This analysis

Itakura *et al.* 2018-11-21

345 confirmed the previously reported expression of *tyn* in the mouth parts including  
346 the pharynx and esophagus, posterior spiracles (PS), denticle belts, and  
347 epidermis (Fig. 5A, C, D, E) [12], as well as in the hindgut (Fig. 5A). In addition,  
348 we observed strong *tyn* expression not only in PS but in the whole tracheal  
349 system, from stage 14 to stage 17, with a peak at stage 15 (Fig. 5A, B, E, F).  
350 The *tyn* mRNA was localized to the apical cortex of the tracheal cells and  
351 fibrous structures in the lumen (arrowheads in Fig. 5B' and F). We speculate  
352 that the luminal *tyn* mRNA was co-secreted during a massive secretion pulse of  
353 proteins and polysaccharides that is known to occur during tracheal  
354 development [33]. The *tyn* expression in the mouth parts and epidermis was  
355 strong at stage 16 (Fig. 5C, D). The *tyn* expression in PS and DT lasted until  
356 stage 17 (Fig. 5E, F).

357

358 **Figure 5.** *tyn* mRNA expression at late embryonic stages. (A) At stage 14, *tyn*  
359 mRNA was expressed in the posterior spiracles (PS), mouth parts (M), hindgut  
360 (HG), and part of the dorsal trunk (DT). (B) The *tyn* mRNA was expressed in the

Itakura *et al.* 2018-11-21

361 tracheal system most strongly at stage 15. At stage 16, strong expression was  
362 observed in the mouth parts (C) and epidermis (D, dorsal view). *tyn* mRNA  
363 expression lasted until stage 17 in the PS (E, dorsal view) and DT (F), but not in  
364 the epidermis. Scale bar: 100  $\mu\text{m}$  for A, B, 20  $\mu\text{m}$  for B', C-F. Black arrowheads  
365 in B' and F indicate luminal mRNA.

366

367 ***tyn* is required for protein clearance and gas filling in the tracheal lumen**

368 We next examined the maturation process of the trachea. The *tyn*<sup>1</sup> and *tyn*<sup>2</sup>  
369 mutant larvae lacked fully gas-filled trachea (Fig. 6A), and their posterior  
370 spiracles had an abnormal morphology (Supplementary Fig. 2). Based on  
371 similar observations in *tyn*<sup>PG38</sup> mutants, Wang *et al.* suggested that the *tyn*  
372 mutation caused a loss of posterior spiracle valve structures and unrestricted  
373 liquid flow between the tracheal lumen and outside liquid, resulting in a defect in  
374 liquid clearance, or gas filling [19]. However, given the strong *tyn* mRNA  
375 expression in the whole tracheal system, we sought an alternative explanation  
376 for the gas-filling defect. Time-lapse imaging with control embryos revealed the



Itakura *et al.* 2018-11-21

377 normal time course for gas filling (Fig. 6B i-vi). After gas bubbles initially formed  
378 in the central metameres, the gas spread into the dorsal trunk (DT) (Fig. 6B, ii),  
379 traversed across dorsal branch 10 (DB10, Fig. 6B, iii), spread into the  
380 contralateral DT, and finally filled the other small branches and posterior  
381 spiracle (Fig. 6B, iv, white and yellow arrowheads, respectively). In the *tyn*  
382 mutants, the gas-filling defect was nearly complete in the posterior spiracle, but  
383 was variable in the DT (Fig. 6C). The timing of the first bubble formation in the  
384 *tyn* mutants showing full or partial gas filling was delayed by ~3 hours compared  
385 to control embryos (Fig. 6D), while the duration of the hatching behavior was  
386 normal (Fig. 6E).

387

388 **Figure 6.** Delayed and partial gas-filling, and protein clearance failure in *tyn*  
389 mutants. (A) Tracheal tubules in a *tyn*<sup>1</sup> sibling control embryo were filled with  
390 gas and bordered by a thick black line (upper panel, arrows). In the *tyn*<sup>1</sup> mutant,  
391 the trachea had translucent borders and lacked gas (bottom panel,  
392 arrowheads). (B) The normal gas-filling process observed in a *tyn*<sup>1</sup> sibling

Itakura *et al.* 2018-11-21

393 control: (i) tracheal tube before liquid-gas transition, (ii) first gas-filling, (iii)  
394 extension to the contralateral side through posterior anastomosis (arrowhead),  
395 (iv) subsequent propagation to the branches (white arrowheads) and posterior  
396 spiracles (yellow arrowheads), (v) extrusion of the head from the vitelline  
397 membrane, (vi) hatching. (C) The degree of gas-filling was classified into three  
398 levels for each of the two parts, dorsal trunk (DT, upper) and posterior spiracles  
399 (PS, bottom), for each of five genotypes: *tyn*<sup>1</sup> sibling control, *tyn*<sup>1</sup> mutant, *tyn*<sup>2</sup>  
400 sibling control, *tyn*<sup>2</sup> mutant, and no-mutation control (left to right). The YFP  
401 signal indicated the presence of the X-chromosome balancer, FM7 with Dfd-  
402 YFP. (D, E) The time when the embryo's head emerged from the vitelline  
403 membrane (B-v) was set as 0, and the timing of the first gas-filling (D) or  
404 hatching (E) is shown as a boxplot with S.E.M. for each of the five genotypes.  
405 For the first gas-filling time, a Kruskal-Wallis test followed by Dunn's multiple  
406 comparisons test detected significant differences between the three pairs: *tyn*<sup>1</sup>  
407 sibling control vs mutant (\*\*P<0.01), *tyn*<sup>2</sup> sibling control vs mutant  
408 (\*\*\*\*P<0.0001), and *tyn*<sup>2</sup> mutant vs no-mutation control (\*P<0.05). There was no

Itakura *et al.* 2018-11-21

409 difference in the hatching time. (F, G) First-instar larva expressing Serp-CBD-  
410 GFP (green) and p120-TagRFP (magenta) by the *btl-gal4* driver with (F) or  
411 without (G) a functional *tyn* gene. (F) The control tracheal tube was filled with  
412 gas and Serp-CBD-GFP was completely removed from the lumen. (G) The *tyn*  
413 mutant lumen was filled with Serp-CBD-GFP. Scale bar: 100  $\mu$ m.

414

415 To explore the reason for the significantly delayed onset of gas bubble  
416 formation, we observed the events prior to tracheal tube maturation. The  
417 tracheal branching, fusion, tube elongation, and diameter expansion proceeded  
418 normally in the *tyn* mutants, resulting in a DT filled with chitin at stage 16 (data  
419 not shown). In normal embryos, a massive absorption of luminal proteins occurs  
420 at stage 17, followed by gas-filling or liquid clearance (Fig. 6F;[33]). We found  
421 that *tyn* mutants at stage 17 retained a luminal protein marker [GFP-tagged  
422 Serpentine Chitin Binding Domain (Serp-CBD-GFP) [21]], suggesting that the  
423 endocytosis of luminal proteins failed (Fig. 6G). These observations indicated

Itakura *et al.* 2018-11-21

424 that the *tyn* mutant trachea had a defect in protein clearance, resulting in  
425 delayed and incomplete gas-filling.

426

427 **Pore-like structures in the tracheal cuticle are defective in *tyn* mutants**

428 Prior to the protein and liquid clearance, cuticle deposition begins at stage 16,  
429 and involves the formation of taenidial folds over the apical cell surface of  
430 tracheal cells [34]. Since the cuticle layers physically separate the luminal liquid  
431 and molecules from the plasma membrane of tracheal cells, how the massive  
432 pulse of luminal liquid and molecule absorption occurs is not well understood.  
433 To examine this process, we used TEM to observe the ultrastructure of the  
434 tracheal cuticle. In control flies, the longitudinal section of the DT exhibited  
435 regularly spaced ridges of taenidial folds, which were separated by thin  
436 interteanidial cuticle that was enriched with electron-dense materials (Fig. 7A).  
437 These materials occasionally appeared as parallel dense lines, indicating a  
438 pore connecting the luminal space to the cell surface (Fig. 7A, A', A'',  
439 arrowheads). The inner space was lucent and around 20-nm in diameter.

Itakura *et al.* 2018-11-21

440 Hereafter we will call this pore structure a “taenidial channel” (TC). In the *tyn*<sup>1</sup>  
441 mutants, the electron-dense materials of the TC were cloudy, and distinct TCs  
442 were not observed (Fig. 7B, B’). In addition, the apical tracheal cell membrane  
443 was slightly bulged out at the site of intertaenidial cuticle in the control (Fig. 7A,  
444 A’), and this bulging was more prominent in the *tyn*<sup>1</sup> mutants (Fig. 7B’, arrow).

445

446 **Figure 7.** Defective ultrastructures in the *tyn*<sup>1</sup> mutant. (A, B) TEM images of the  
447 taenidial folds in *y*<sup>2</sup>, *cho*<sup>2</sup>, *v*<sup>1</sup> (A-A’’) and *tyn*<sup>1</sup>, *y*<sup>2</sup>, *cho*<sup>2</sup>, *v*<sup>1</sup> (B-B’). A’, A’’, B’ B’’ are  
448 enlarged views of the regions indicated by rectangles in A, A’, B, B’,  
449 respectively. Arrowheads in A’ indicate a pore-like structure we called the  
450 “taenidial channel” (TC). Dotted lines: plasma membrane. Arrow in B’: a  
451 prominent protrusion of the tracheal cell. Scale bars: 200 nm in A, A’, B, B’ and  
452 50 nm in A’’ and B’’.

453

454 **Discussion**

Itakura *et al.* 2018-11-21

455 In this study, using newly established *tyn*-null mutants, we showed that *tyn* is  
456 required for the building of specific substructures in the epidermal and tracheal  
457 cuticles. The *tyn* mutations caused defects in epidermal barrier function and in  
458 luminal protein clearance of the tracheal tubule, resulting a variety of  
459 physiological and behavioral problems. Based on these results, we were able to  
460 elucidate some of the physiological roles of cuticular substructures, which are  
461 discussed below.

462

### 463 **Tyn supports the epidermal barrier function**

464 The insect cuticle consists of three layers: the lipid-rich envelope, protein-rich  
465 epicuticle, and Chitin-rich procuticle. These layers are thought to play distinct  
466 roles in the epidermis. For instance, loss of the *Chitin Synthase-1 (CS-1)* gene,  
467 also called *krotz-kopf verkehrt (kkv)*, causes an abnormal procuticle, which  
468 results in compromised epicuticle, detachment between the cuticle and  
469 epidermal cells, and a deformed body shape [35]. Thus, the procuticle layer  
470 provides mechanical strength to the cuticle structure. The envelope layer has a

Itakura *et al.* 2018-11-21

471 barrier function. Loss of the ABC transporter *snustorr* (*snu*) causes an abnormal  
472 envelope structure and a dramatically reduced barrier function [26]. The  
473 envelope consists of alternating electron-dense and electron-lucid sublayers [7].  
474 In *snu* mutants, one of the electron-dense sublayers is lost. *snu* mutant and  
475 RNAi-induced knockdown larvae fail to hatch, and when freed from the egg  
476 case, they immediately die from dehydration [26]. In contrast, the *tyn* mutants  
477 exhibited a more specific structural anomaly in the envelope, fragmentation of  
478 the outermost sublayer. The *tyn* mutant larvae were able to hatch and survive  
479 for a few days, despite exhibiting severe behavioral and growth defects,  
480 suggesting that dehydration was not the direct cause of their lethality. The  
481 Eosin Y permeability in the *tyn* mutants was also much lower than that observed  
482 in *snu* mutants [26]. Therefore, some aspects of the barrier function including  
483 the internal water retention are maintained in the absence of *tyn* and the  
484 outermost envelope sublayer. Our observations using *tyn* mutants support the  
485 idea that the outermost envelope layer is essential for the barrier function. The  
486 phenotypes of *tyn* and *snu* uncovered non-redundant, protective functions of

Itakura *et al.* 2018-11-21

487 the envelope sublayers, which together form a robust barrier that protects  
488 larvae from the external environment.

489

490 **Tyn supports protein clearance from the embryonic trachea**

491 The deposition, assembly, and chemical modification of fibrous aECM  
492 consisting of ZP proteins and chitin in the lumen of tracheal tubules are  
493 essential for proper regulation of the tube diameter and length [17,21,36-38] .

494 Once the tracheal tubules reach their final shape, the luminal aECM is  
495 degraded and replaced by gas prior to larval hatching. A massive wave of  
496 endocytosis then removes aECM components into the tracheal cells [33]. At  
497 stage 16, prior to this endocytosis wave, 150-500-nm thick cuticle layers  
498 develop on the apical surface of tracheal cells [34]. How the degraded luminal  
499 aECM is then absorbed efficiently by the tracheal cells through the physical  
500 barrier of the cuticles has not been understood. Here, using TEM we observed  
501 pore-like structures, which we called “taenidial channels” (TCs), in the inter-  
502 taenidial fold region of the tracheal cuticle. The internal surface of the TC was



Itakura *et al.* 2018-11-21

503 electron-dense and continuous with the envelope layer of the tracheal cuticles,  
504 suggesting that it was part of the cuticular envelope. The TCs were abnormal in  
505 the *tyn* mutants at the time of the endocytosis wave. We hypothesize that the  
506 TC is the channel that permits the passage of materials from the luminal space  
507 to the plasma membrane for their efficient endocytic uptake, and that the  
508 malformation of TCs in the *tyn* mutants resulted in reduced efficiencies in  
509 endocytosis and the clearance of luminal materials.

510 The *tyn* mutations also delayed and/or inhibited the gas filling of the tracheal  
511 system. Although the nature of the gases first appearing in the lumen and the  
512 mechanism of gas generation are still not understood, one major hypothesis is  
513 that the cavitation forms from gas-saturated luminal liquid on the lipid-covered  
514 hydrophobic surface of the cuticle [39,40] . Organic substances remaining in the  
515 lumen of *tyn* mutant trachea would reduce the saturation level of gases due to a  
516 salting-out effect [41]. Inefficient closure of the tracheal tubule due to defective  
517 posterior spiracle formation would further delay gas saturation in the tracheal

Itakura *et al.* 2018-11-21

518 lumen [19]. These two mechanisms could collectively inhibit the tracheal gas  
519 generation in *tyn* mutants.

520 In the epidermis of insects including *Galleria*, *Tenebrio*, *Tribolium*, and  
521 *Drosophila* the pore canal (PC) structure runs vertically through the cuticle  
522 layers and was proposed to have a role in wax secretion [42-44] . Similar  
523 structures are also described in crustaceans [45]. It will be interesting to  
524 determine if the PC has any similarity to the tracheal TC described in this work.  
525 The evolutionarily conserved *tyn* gene would be a good starting point for further  
526 investigations into the structural and functional characterization of the PC and  
527 TC.

528

## 529 **Author Contributions**

530 Y.I. and S.H. conceived the project and designed the experiments. Y.I. and S.I.  
531 obtained the experimental data with help from H.W. Y.I. and S.H. analyzed the  
532 data and wrote the manuscript.

533

Itakura *et al.* 2018-11-21

534 **Acknowledgements**

535 We thank the Japan National Institute of Genetics and Bloomington Stock  
536 Center for providing fly stocks. We also thank Y. Takahashi and S. Yonemura  
537 (RIKEN) for generously providing their expert advice and reagents and for  
538 allowing us to use their equipment for EM techniques. We are also grateful to T.  
539 Nishimura (RIKEN) and members of the Hayashi laboratory for helpful  
540 comments. This work was supported in part by “Initiative for the  
541 implementation of the diversity research environment” from MEXT JAPAN.

542

543 **Competing interests**

544 The authors declare no competing or financial interests.

Itakura *et al.* 2018-11-21

545 References

- 546 1. Charkoudian N. Skin Blood Flow in Adult Human Thermoregulation: How  
547 It Works, When It Does Not, and Why. Mayo Clinic Proceedings. Elsevier;  
548 2003;78: 603–612. doi:10.4065/78.5.603
- 549 2. Lumpkin EA, Caterina MJ. Mechanisms of sensory transduction in the  
550 skin. Nature. Nature Publishing Group; 2007;445: 858–865.  
551 doi:10.1038/nature05662
- 552 3. Bouwstra JA, Ponc M. The skin barrier in healthy and diseased state.  
553 Biochimica et Biophysica Acta (BBA) - Biomembranes. Elsevier;  
554 2006;1758: 2080–2095. doi:10.1016/j.bbamem.2006.06.021
- 555 4. Fluhr JW, Mao-Qiang M, Brown BE, Wertz PW, Crumrine D, Sundberg  
556 JP, et al. Glycerol Regulates Stratum Corneum Hydration in Sebaceous  
557 Gland Deficient (Asebia) Mice. Journal of Investigative Dermatology.  
558 Elsevier; 2003;120: 728–737. doi:10.1046/j.1523-1747.2003.12134.x
- 559 5. Smith KR, Thiboutot DM. Thematic review series: Skin Lipids. Sebaceous  
560 gland lipids: friend or foe? J Lipid Res. American Society for Biochemistry  
561 and Molecular Biology; 2008;49: 271–281. doi:10.1194/jlr.R700015-  
562 JLR200
- 563 6. Weidinger S, Beck LA, Bieber T, Kabashima K, Irvine AD. Atopic  
564 dermatitis. Nat Rev Dis Primers. Nature Publishing Group; 2018;4: 1.  
565 doi:10.1038/s41572-018-0001-z
- 566 7. Moussian B, Seifarth C, Müller U, Berger J, Schwarz H. Cuticle  
567 differentiation during Drosophila embryogenesis. Arthropod Struct Dev.  
568 2006;35: 137–152. doi:10.1016/j.asd.2006.05.003
- 569 8. Bork P, Sander C. A large domain common to sperm receptors (Zp2 and  
570 Zp3) and TGF-beta type III receptor. FEBS Lett. 1992;300: 237–240.
- 571 9. Jovine L, Darie CC, Litscher ES, Wassarman PM. Zona pellucida domain

Itakura *et al.* 2018-11-21

- 572 proteins. *Annu Rev Biochem.* 2005;74: 83–114.  
573 doi:10.1146/annurev.biochem.74.082803.133039
- 574 10. Jovine L, Qi H, Williams Z, Litscher E, Wassarman PM. The ZP domain is  
575 a conserved module for polymerization of extracellular proteins. *Nature*  
576 *Cell Biology.* Nature Publishing Group; 2002;4: 457–461.  
577 doi:10.1038/ncb802
- 578 11. Plaza S, Chanut-Delalande H, Fernandes I, Wassarman PM, Payre F.  
579 From A to Z: apical structures and zona pellucida-domain proteins.  
580 *Trends Cell Biol.* 2010;20: 524–532. doi:10.1016/j.tcb.2010.06.002
- 581 12. Jaźwińska A, Affolter M. A family of genes encoding zona pellucida (ZP)  
582 domain proteins is expressed in various epithelial tissues during  
583 *Drosophila* embryogenesis. *Gene Expression Patterns.* 2004;4: 413–421.  
584 doi:10.1016/j.modgep.2004.01.003
- 585 13. Fernandes I, Chanut-Delalande H, Ferrer P, Latapie Y, Waltzer L, Affolter  
586 M, et al. Zona Pellucida Domain Proteins Remodel the Apical  
587 Compartment for Localized Cell Shape Changes. *Developmental Cell.*  
588 2010;18: 64–76. doi:10.1016/j.devcel.2009.11.009
- 589 14. Prout M, Damania Z, Soong J, Fristrom D, Fristrom JW. Autosomal  
590 mutations affecting adhesion between wing surfaces in *Drosophila*  
591 *melanogaster*. *Genetics.* Genetics Society of America; 1997;146: 275–  
592 285.
- 593 15. Wilkin MB, Becker MN, Mulvey D, Phan I, Chao A, Cooper K, et al.  
594 *Drosophila dumpy* is a gigantic extracellular protein required to maintain  
595 tension at epidermal-cuticle attachment sites. *Curr Biol.* 2000;10: 559–  
596 567.
- 597 16. Jaźwińska A, Ribeiro C, Affolter M. Epithelial tube morphogenesis during  
598 *Drosophila* tracheal development requires Piopio, a luminal ZP protein.  
599 *Nature Cell Biology.* Nature Publishing Group; 2003;5: 895–901.

Itakura *et al.* 2018-11-21

- 600           doi:10.1038/ncb1049
- 601   17.   Dong B, Hannezo E, Hayashi S. Balance between apical membrane  
602           growth and luminal matrix resistance determines epithelial tubule shape.  
603           Cell Rep. 2014;7: 941–950. doi:10.1016/j.celrep.2014.03.066
- 604   18.   Ray RP, Matamoro-Vidal A, Ribeiro PS, Tapon N, Houle D, Salazar-  
605           Ciudad I, et al. Patterned Anchorage to the Apical Extracellular Matrix  
606           Defines Tissue Shape in the Developing Appendages of *Drosophila*.  
607           Developmental Cell. 2015;34: 310–322. doi:10.1016/j.devcel.2015.06.019
- 608   19.   Wang Y, Berger J, Moussian B. Trynity models a tube valve in the  
609           *Drosophila* larval airway system. Dev Biol. 2018;437: 75–83.  
610           doi:10.1016/j.ydbio.2018.02.019
- 611   20.   Bourbon H-M, Gonzy-Treboul G, Peronnet F, Alin M-F, Ardourel C,  
612           Benassayag C, et al. A P-insertion screen identifying novel X-linked  
613           essential genes in *Drosophila*. Mech Dev. 2002;110: 71–83.
- 614   21.   Luschnig S, Bätz T, Armbruster K, Krasnow MA. serpentine and  
615           vermiform encode matrix proteins with chitin binding and deacetylation  
616           domains that limit tracheal tube length in *Drosophila*. Curr Biol. 2006;16:  
617           186–194. doi:10.1016/j.cub.2005.11.072
- 618   22.   Magie CR, Pinto-Santini D, Parkhurst SM. Rho1 interacts with p120ctn  
619           and alpha-catenin, and regulates cadherin-based adherens junction  
620           components in *Drosophila*. Development. 2002;129: 3771–3782.
- 621   23.   Gratz SJ, Ukken FP, Rubinstein CD, Thiede G, Donohue LK, Cummings  
622           AM, et al. Highly specific and efficient CRISPR/Cas9-catalyzed homology-  
623           directed repair in *Drosophila*. Genetics. Genetics; 2014;196: 961–971.  
624           doi:10.1534/genetics.113.160713
- 625   24.   Farboud B, Meyer BJ. Dramatic enhancement of genome editing by  
626           CRISPR/Cas9 through improved guide RNA design. Genetics. Genetics;  
627           2015;199: 959–971. doi:10.1534/genetics.115.175166

Itakura *et al.* 2018-11-21

- 628 25. Ota S, Hisano Y, Muraki M, Hoshijima K, Dahlem TJ, Grunwald DJ, et al.  
629 Efficient identification of TALEN-mediated genome modifications using  
630 heteroduplex mobility assays. *Genes Cells. Wiley/Blackwell* (10.1111);  
631 2013;18: 450–458. doi:10.1111/gtc.12050
- 632 26. Zuber R, Norum M, Wang Y, Oehl K, Gehring N, Accardi D, et al. The  
633 ABC transporter Snu and the extracellular protein SnsI cooperate in the  
634 formation of the lipid-based inward and outward barrier in the skin of  
635 *Drosophila*. *Eur J Cell Biol.* 2018;97: 90–101.  
636 doi:10.1016/j.ejcb.2017.12.003
- 637 27. Jones TA, Metzstein MM. Examination of *Drosophila* larval tracheal  
638 terminal cells by light microscopy. *J Vis Exp.* 2013;: e50496–e50496.  
639 doi:10.3791/50496
- 640 28. Tautz D, Pfeifle C. A non-radioactive in situ hybridization method for the  
641 localization of specific RNAs in *Drosophila* embryos reveals translational  
642 control of the segmentation gene hunchback. *Chromosoma.* 1989;98: 81–  
643 85.
- 644 29. McDonald KL, Sharp DJ, Rickoll W. Transmission electron microscopy of  
645 thin sections of *Drosophila*: conventional chemical fixation of embryos  
646 using trialdehyde. *Cold Spring Harb Protoc. Cold Spring Harbor*  
647 *Laboratory Press*; 2012;2012: 516–520. doi:10.1101/pdb.prot068411
- 648 30. Jinek M, Chylinski K, Fonfara I, Hauer M, Doudna JA, Charpentier E. A  
649 programmable dual-RNA-guided DNA endonuclease in adaptive bacterial  
650 immunity. *Science. American Association for the Advancement of*  
651 *Science*; 2012;337: 816–821. doi:10.1126/science.1225829
- 652 31. Kondo S, Ueda R. Highly improved gene targeting by germline-specific  
653 Cas9 expression in *Drosophila*. *Genetics. Genetics*; 2013;195: 715–721.  
654 doi:10.1534/genetics.113.156737
- 655 32. Moussian B, Schwarz H. Preservation of plasma membrane ultrastructure

Itakura *et al.* 2018-11-21

- 656 in *Drosophila* embryos and larvae prepared by high-pressure freezing and  
657 freeze-substitution. *Dros. Inf. Serv.* 2010; 93, 215-219.
- 658 33. Tsarouhas V, Senti K-A, Jayaram SA, Tiklová K, Hemphälä J, Adler J, et  
659 al. Sequential pulses of apical epithelial secretion and endocytosis drive  
660 airway maturation in *Drosophila*. *Developmental Cell.* 2007;13: 214–225.  
661 doi:10.1016/j.devcel.2007.06.008
- 662 34. Öztürk-Çolak A, Moussian B, Araújo SJ, Casanova J. A feedback  
663 mechanism converts individual cell features into a supracellular ECM  
664 structure in *Drosophila* trachea. *eLife. eLife Sciences Publications*  
665 *Limited*; 2016;5: 179. doi:10.7554/eLife.09373
- 666 35. Moussian B, Schwarz H, Bartoszewski S, Nüsslein-Volhard C.  
667 Involvement of chitin in exoskeleton morphogenesis in *Drosophila*  
668 *melanogaster*. *J Morphol. Wiley-Blackwell*; 2005;264: 117–130.  
669 doi:10.1002/jmor.10324
- 670 36. Wang S, Jayaram SA, Hemphälä J, Senti K-A, Tsarouhas V, Jin H, et al.  
671 Septate-junction-dependent luminal deposition of chitin deacetylases  
672 restricts tube elongation in the *Drosophila* trachea. *Curr Biol.* 2006;16:  
673 180–185. doi:10.1016/j.cub.2005.11.074
- 674 37. Tønning A, Hemphälä J, Tång E, Nannmark U, Samakovlis C, Uv A. A  
675 transient luminal chitinous matrix is required to model epithelial tube  
676 diameter in the *Drosophila* trachea. *Developmental Cell.* 2005;9: 423–  
677 430. doi:10.1016/j.devcel.2005.07.012
- 678 38. Dong B, Hayashi S. Shaping of biological tubes by mechanical interaction  
679 of cell and extracellular matrix. *Curr Opin Genet Dev.* 2015;32: 129–134.  
680 doi:10.1016/j.gde.2015.02.009
- 681 39. Jaspers MHJ, Pflanz R, Riedel D, Kawelke S, Feussner I, Schuh R. The  
682 fatty acyl-CoA reductase Waterproof mediates airway clearance in  
683 *Drosophila*. *Dev Biol.* 2014;385: 23–31. doi:10.1016/j.ydbio.2013.10.022



Itakura *et al.* 2018-11-21

- 684 40. Wigglesworth VB. Surface Forces in the Tracheal System of Insects. J  
685 Cell Sci. 1953;s3: 507–522.
- 686 41. Onda K, Sada E, Kobayashi T, Kito S, Ito K. Salting-out parameters of  
687 gas solubility in aqueous salt solutions. J. Chem. Eng. Jpn. The Society of  
688 Chemical Engineers, Japan; 1970;3: 18–24. doi:10.1252/jcej.3.18
- 689 42. Locke M. Pore canals and related structures in insect cuticle. J Biophys  
690 Biochem Cytol. The Rockefeller University Press; 1961;10: 589–618.
- 691 43. Noh MY, Muthukrishnan S, Kramer KJ, Arakane Y. Tribolium castaneum  
692 RR-1 cuticular protein TcCPR4 is required for formation of pore canals in  
693 rigid cuticle. Riddiford LM, editor. PLoS Genet. Public Library of Science;  
694 2015;11: e1004963. doi:10.1371/journal.pgen.1004963
- 695 44. Pesch Y-Y, Riedel D, Patil KR, Loch G, Behr M. Chitinases and Imaginal  
696 disc growth factors organize the extracellular matrix formation at barrier  
697 tissues in insects. Sci Rep. Nature Publishing Group; 2016;6: 18340.  
698 doi:10.1038/srep18340
- 699 45. Seidl B, Huemer K, Neues F, Hild S, Epple M, Ziegler A. Ultrastructure  
700 and mineral distribution in the tergite cuticle of the beach isopod *Tylos*  
701 *europaeus* Arcangeli, 1938. J Struct Biol. 2011;174: 512–526.  
702 doi:10.1016/j.jsb.2011.03.005

703

704 **Supplementary Figure 1.** Abnormal larval behavior in response to food supply.

705 Yeast paste was placed at the center of the well at time 0. (Upper) The numbers

706 of  $y^2$ ,  $cho^2$ ,  $v^1$  larvae inside and outside the paste increased and decreased,

707 respectively, meaning that they gradually moved into the yeast paste.

Itakura *et al.* 2018-11-21

708 Approximately 20% of the larvae were peripheral to the yeast paste at any time  
709 point. (Lower) *tyn*<sup>1</sup> larvae outside the paste decreased similarly to *y*<sup>2</sup>, *cho*<sup>2</sup>, *v*<sup>1</sup>,  
710 indicating that the *tyn*<sup>1</sup> larvae could sense and move toward the food. However,  
711 more larvae tended to stay at the periphery of the food rather than entering it,  
712 compared to the control.

713

714 **Supplementary Figure 2.** Loss of posterior spiracle valve structures. Posterior  
715 spiracles with enlarged views of the posterior tip (dotted-lined region) in the  
716 lower right corner are shown for various genotypes (*y*<sup>2</sup>, *cho*<sup>2</sup>, *v*<sup>1</sup>, Oregon R, *tyn*<sup>1</sup>,  
717 *tyn*<sup>2</sup> and their sibling controls). The yellow arrows indicate valve structures,  
718 which were missing in the *tyn*<sup>1</sup> and *tyn*<sup>2</sup> mutants.

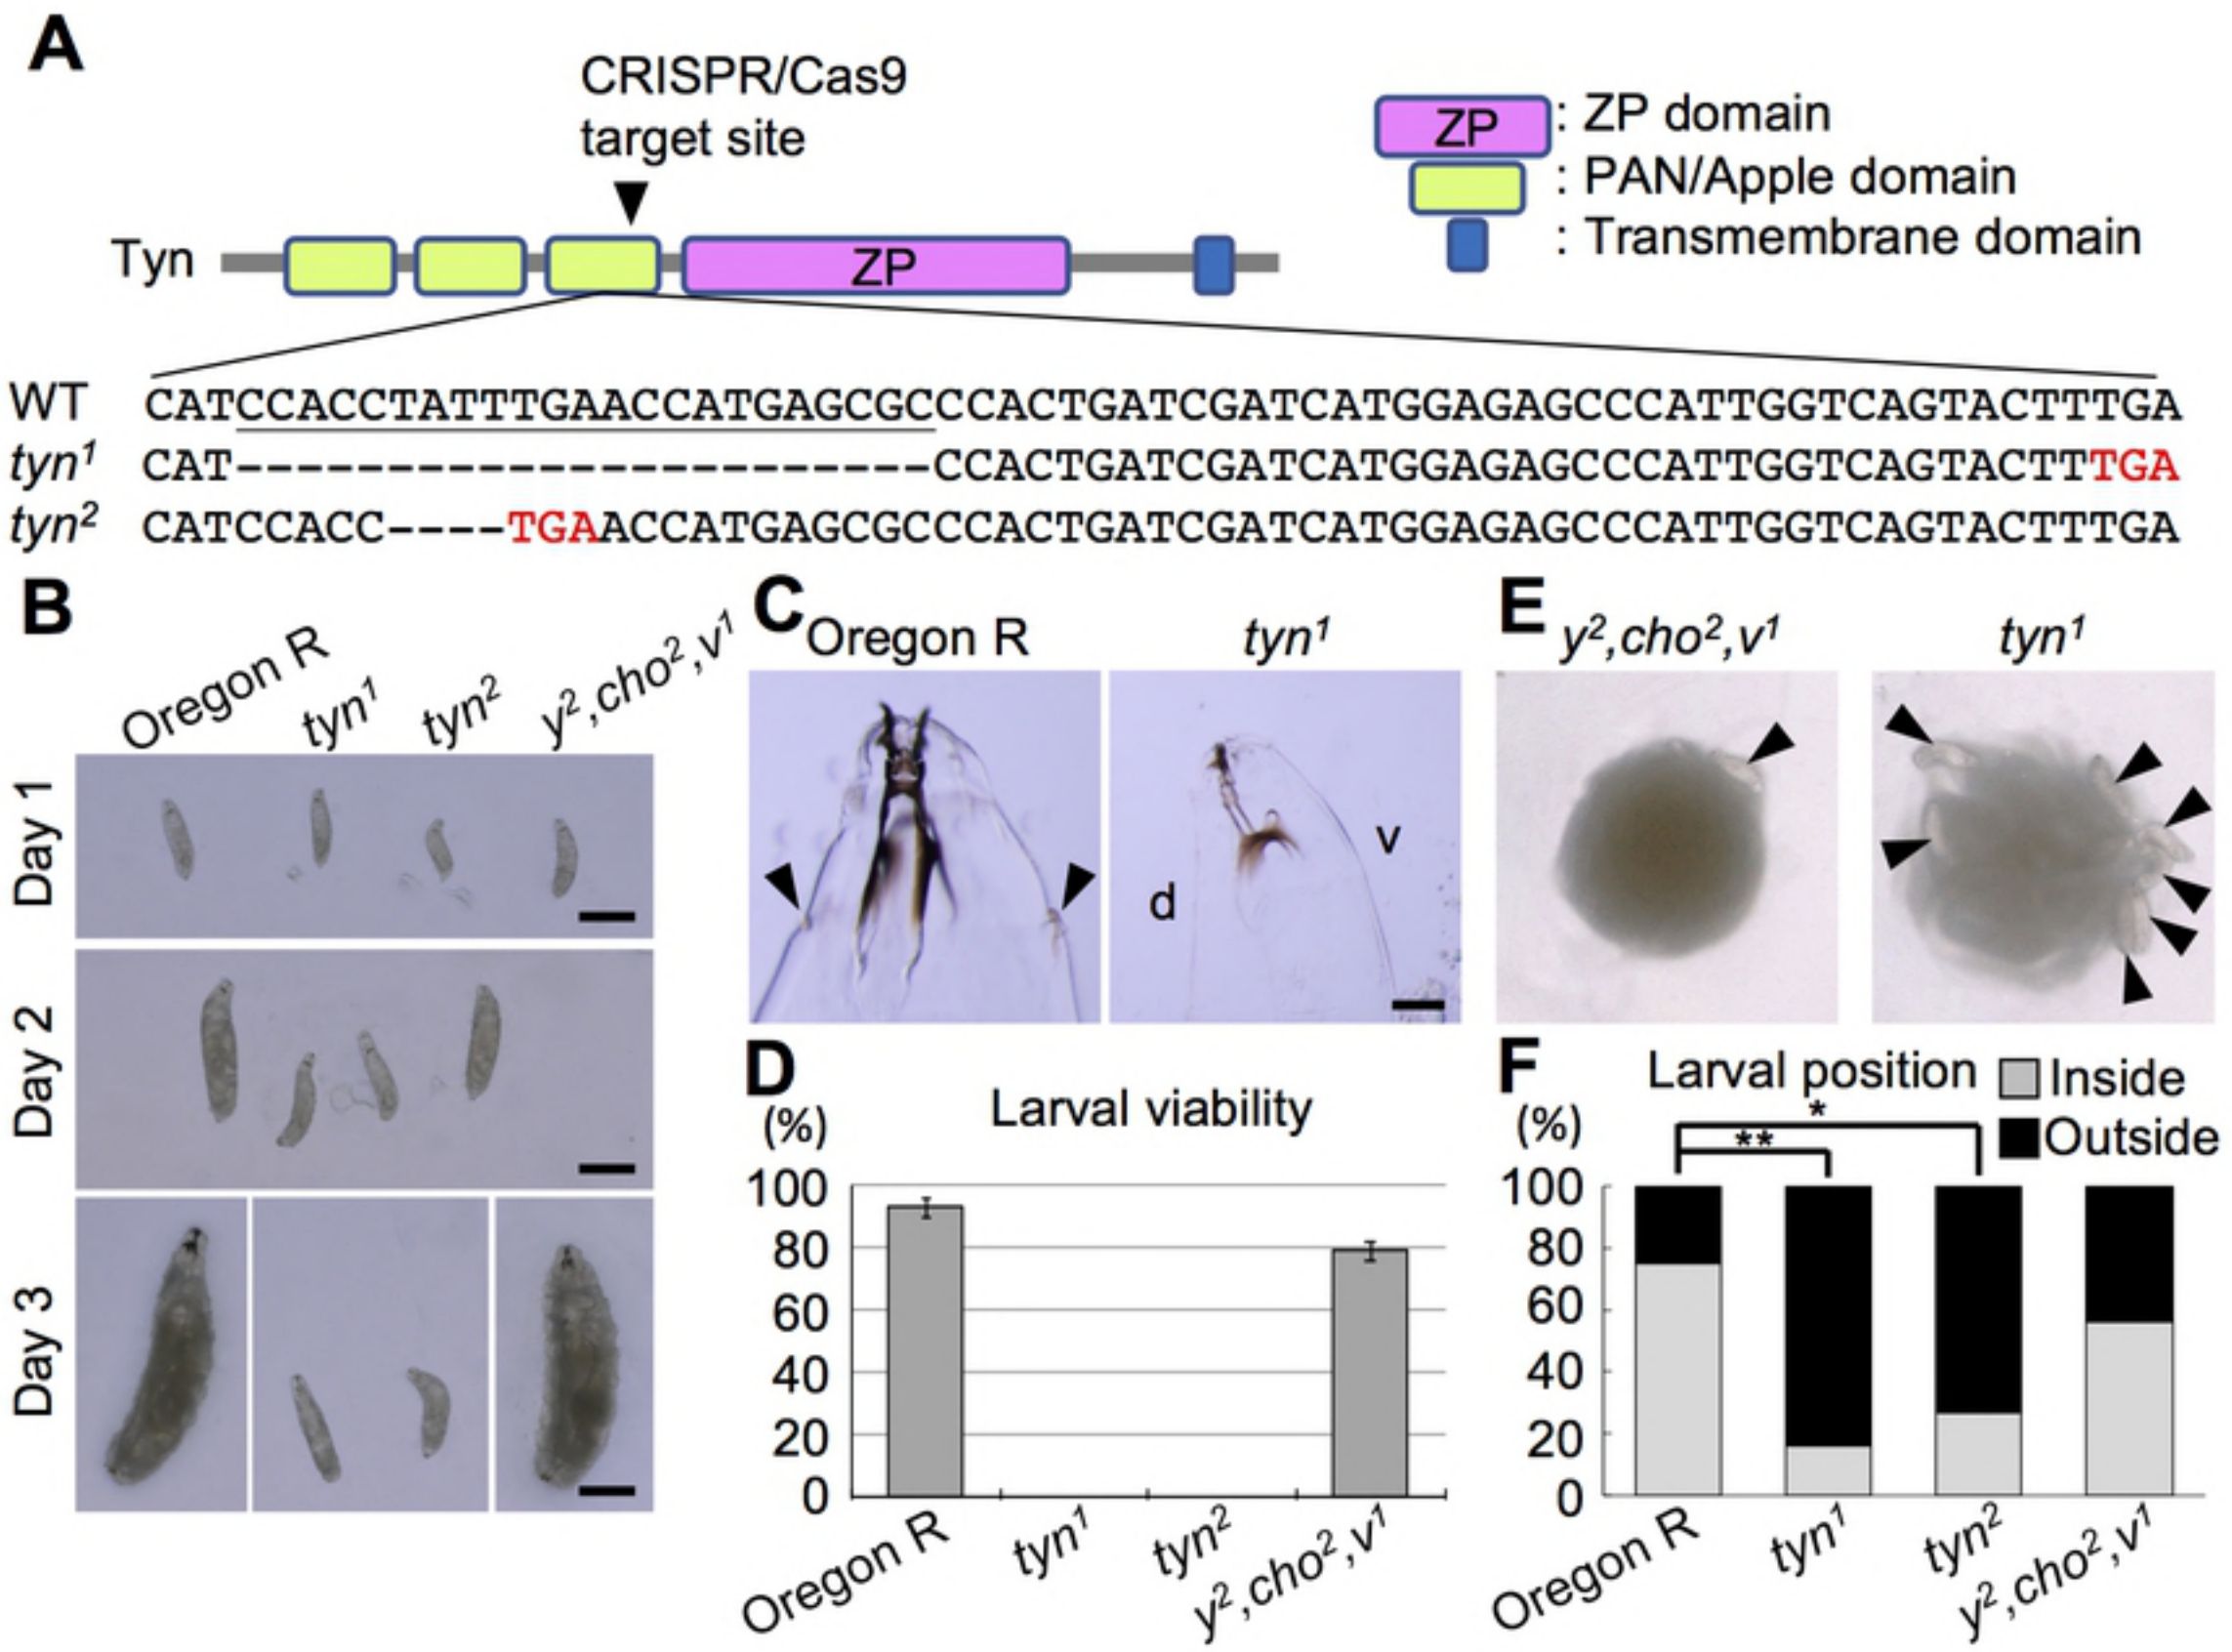

Figure 1

Low Osmolarity

High Osmolarity

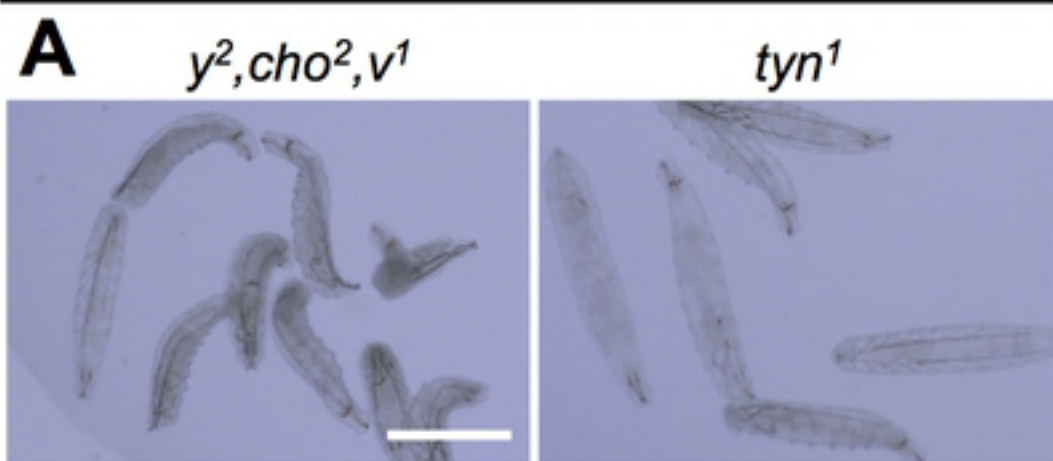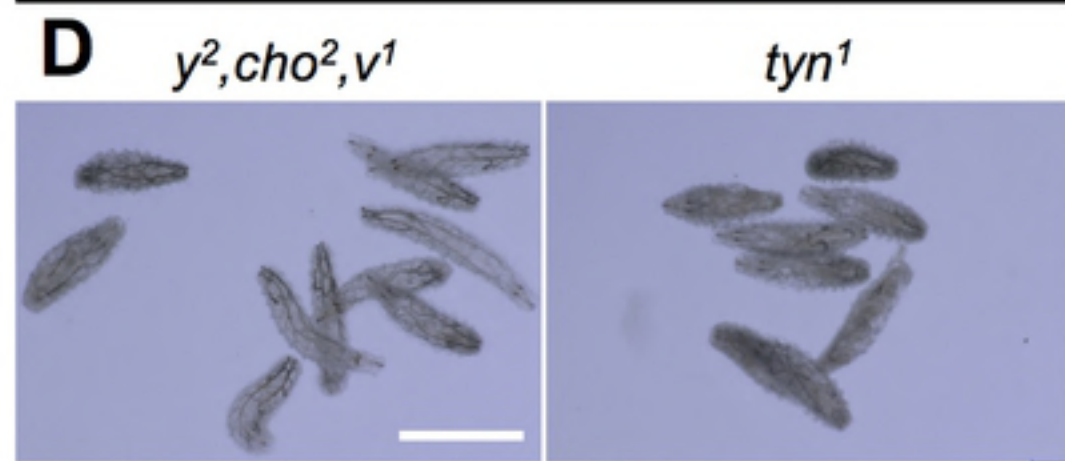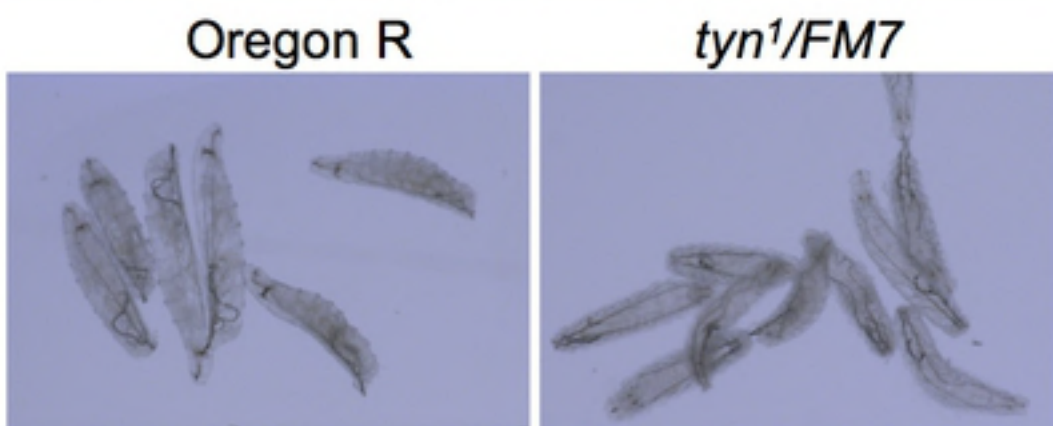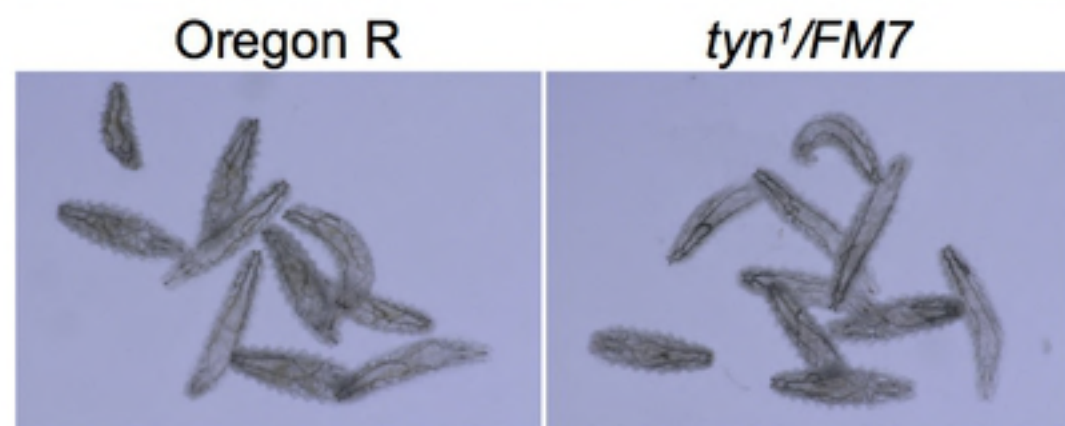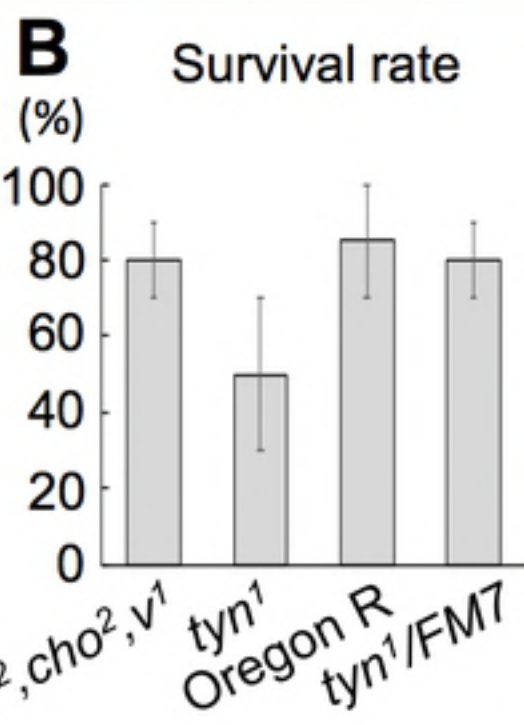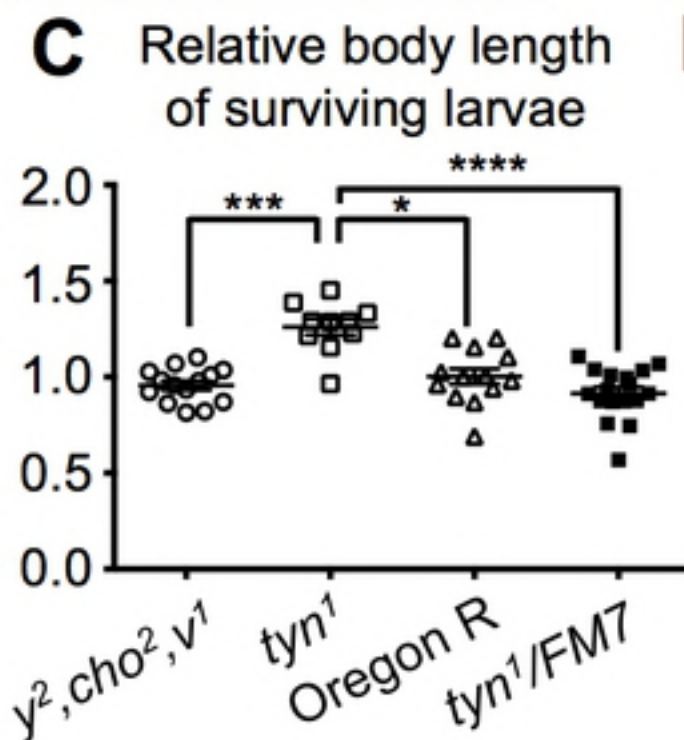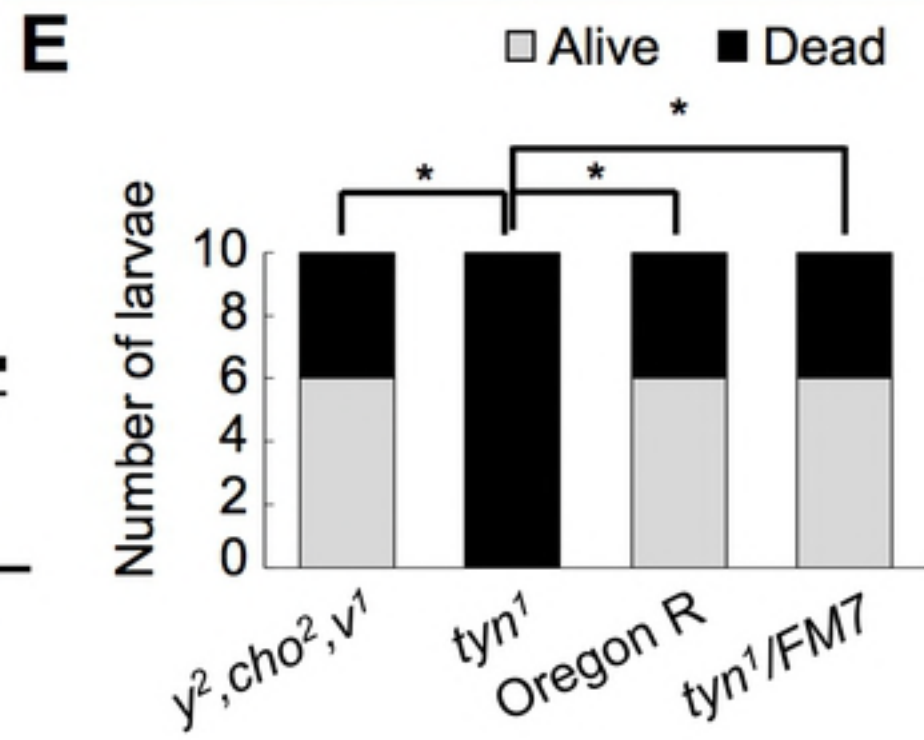

Figure 2

**A**

Eosin Y

*y<sup>2</sup>, cho<sup>2</sup>, v<sup>1</sup>*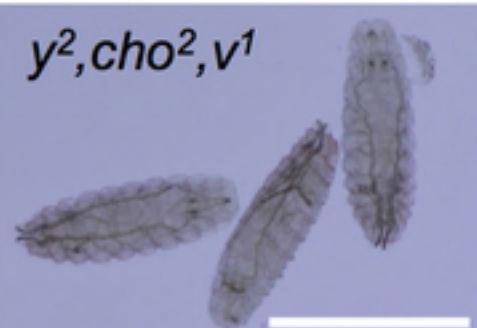*tyn<sup>1</sup>*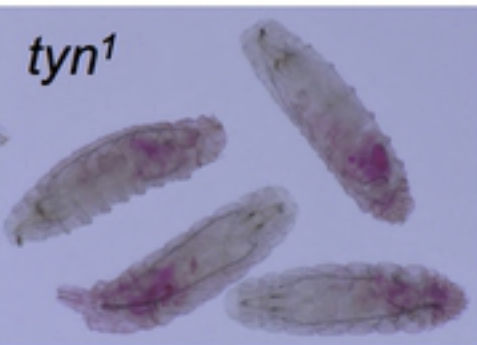**B**

Epidermis

Trachea

Control

DAPI

His2Av-  
mRFP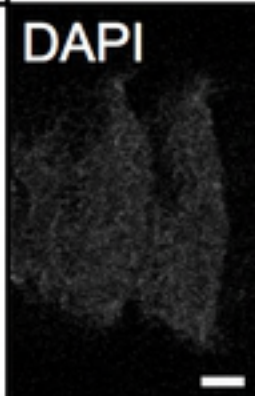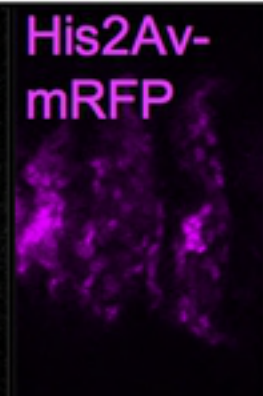

DAPI

His2Av-  
mRFP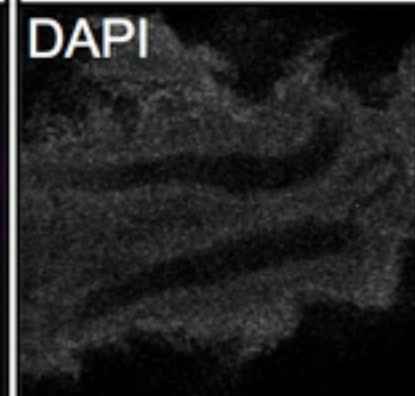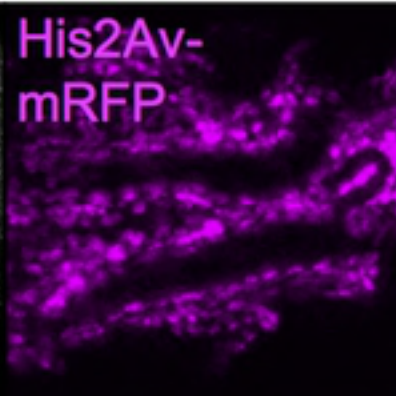

Bright field

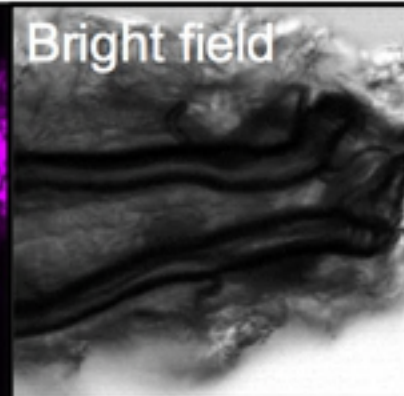

Mutant

DAPI

His2Av-  
mRFP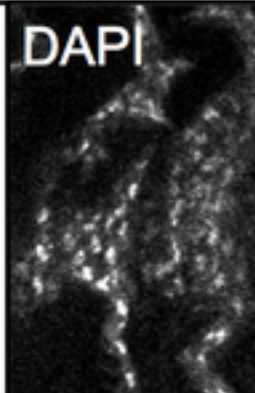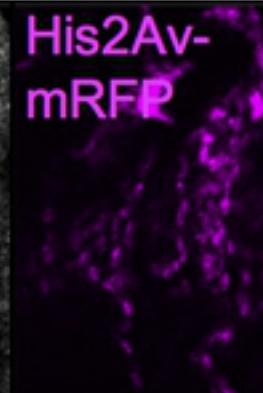

DAPI

His2Av-  
mRFP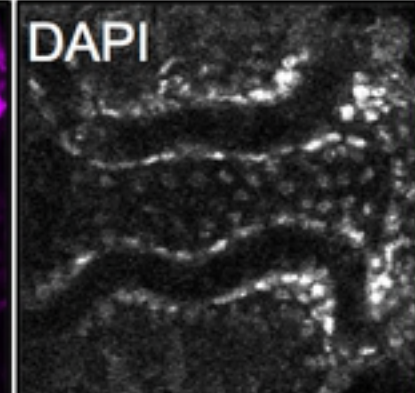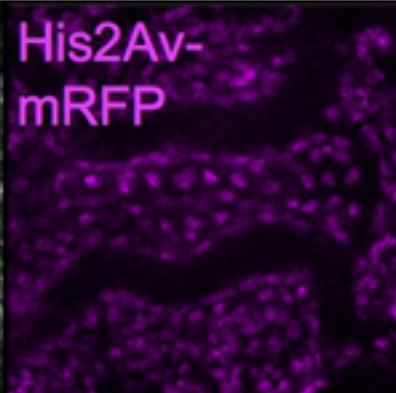

Bright field

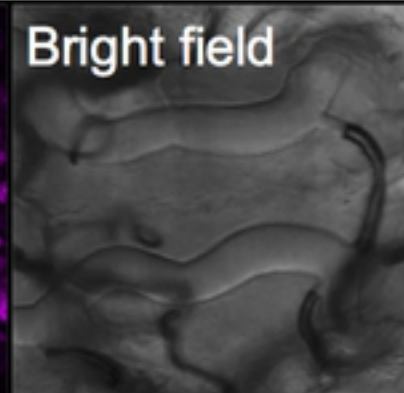

Figure 3

*tyn<sup>1</sup>*

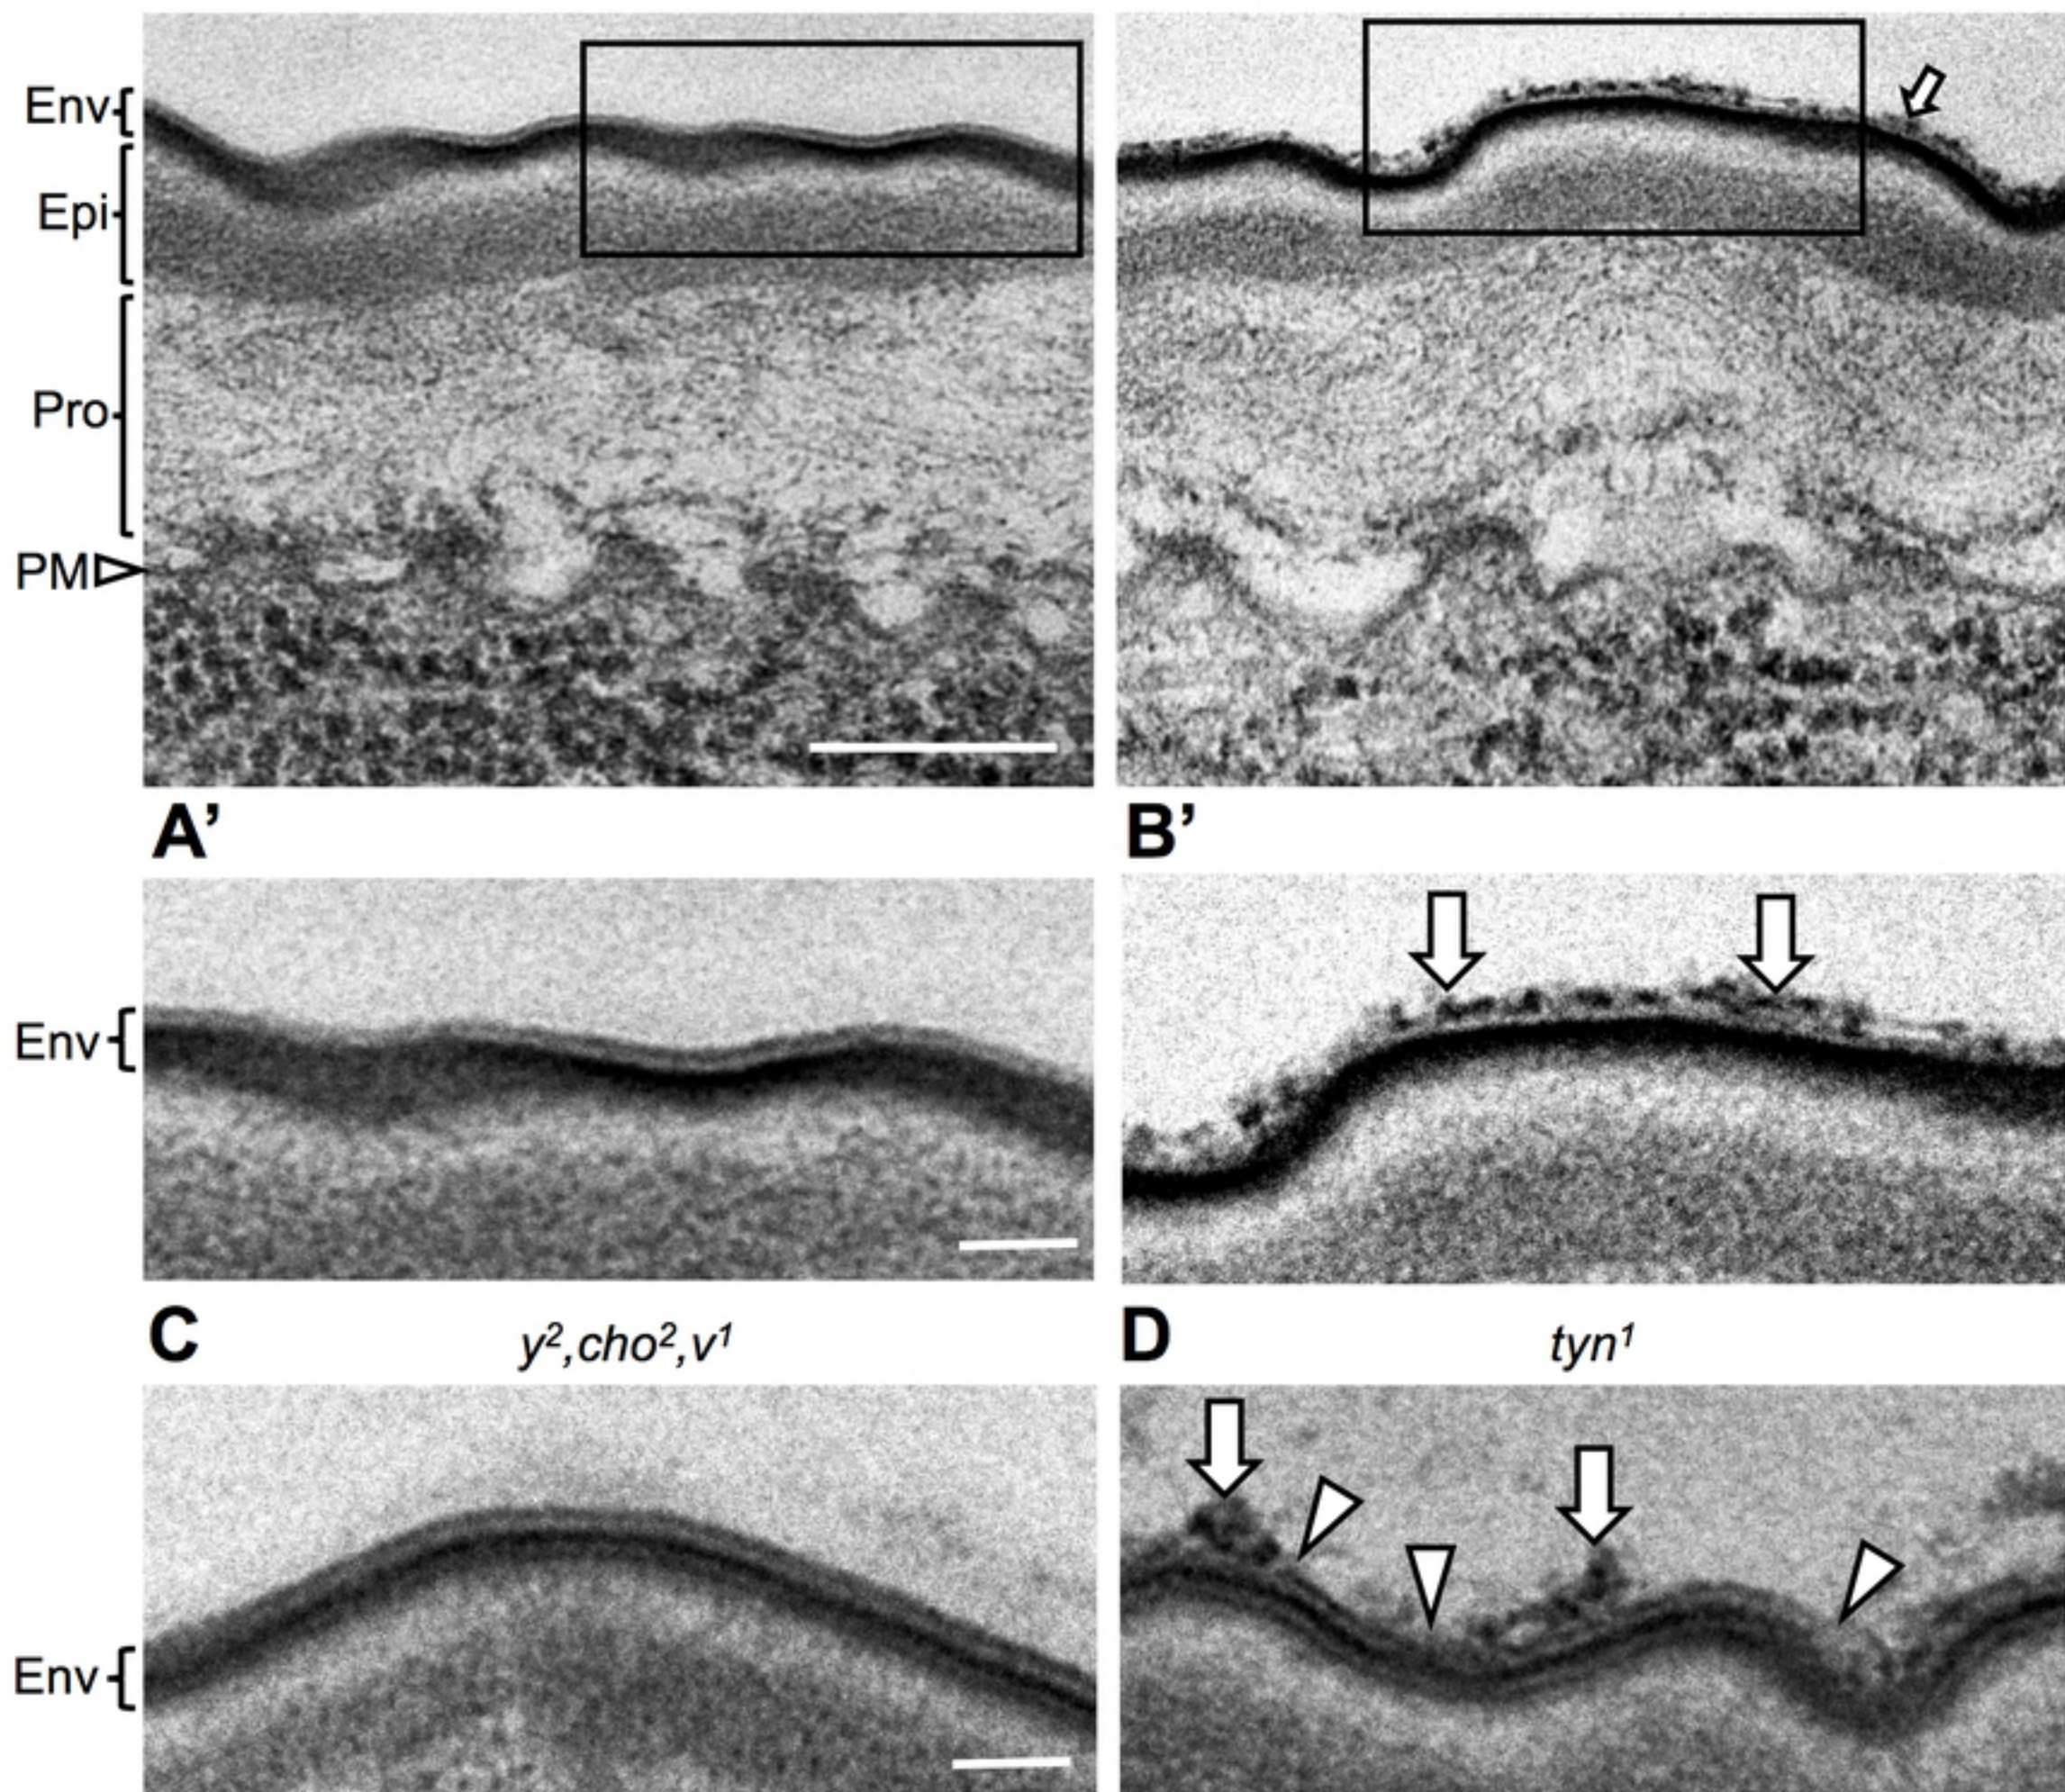

Figure 4

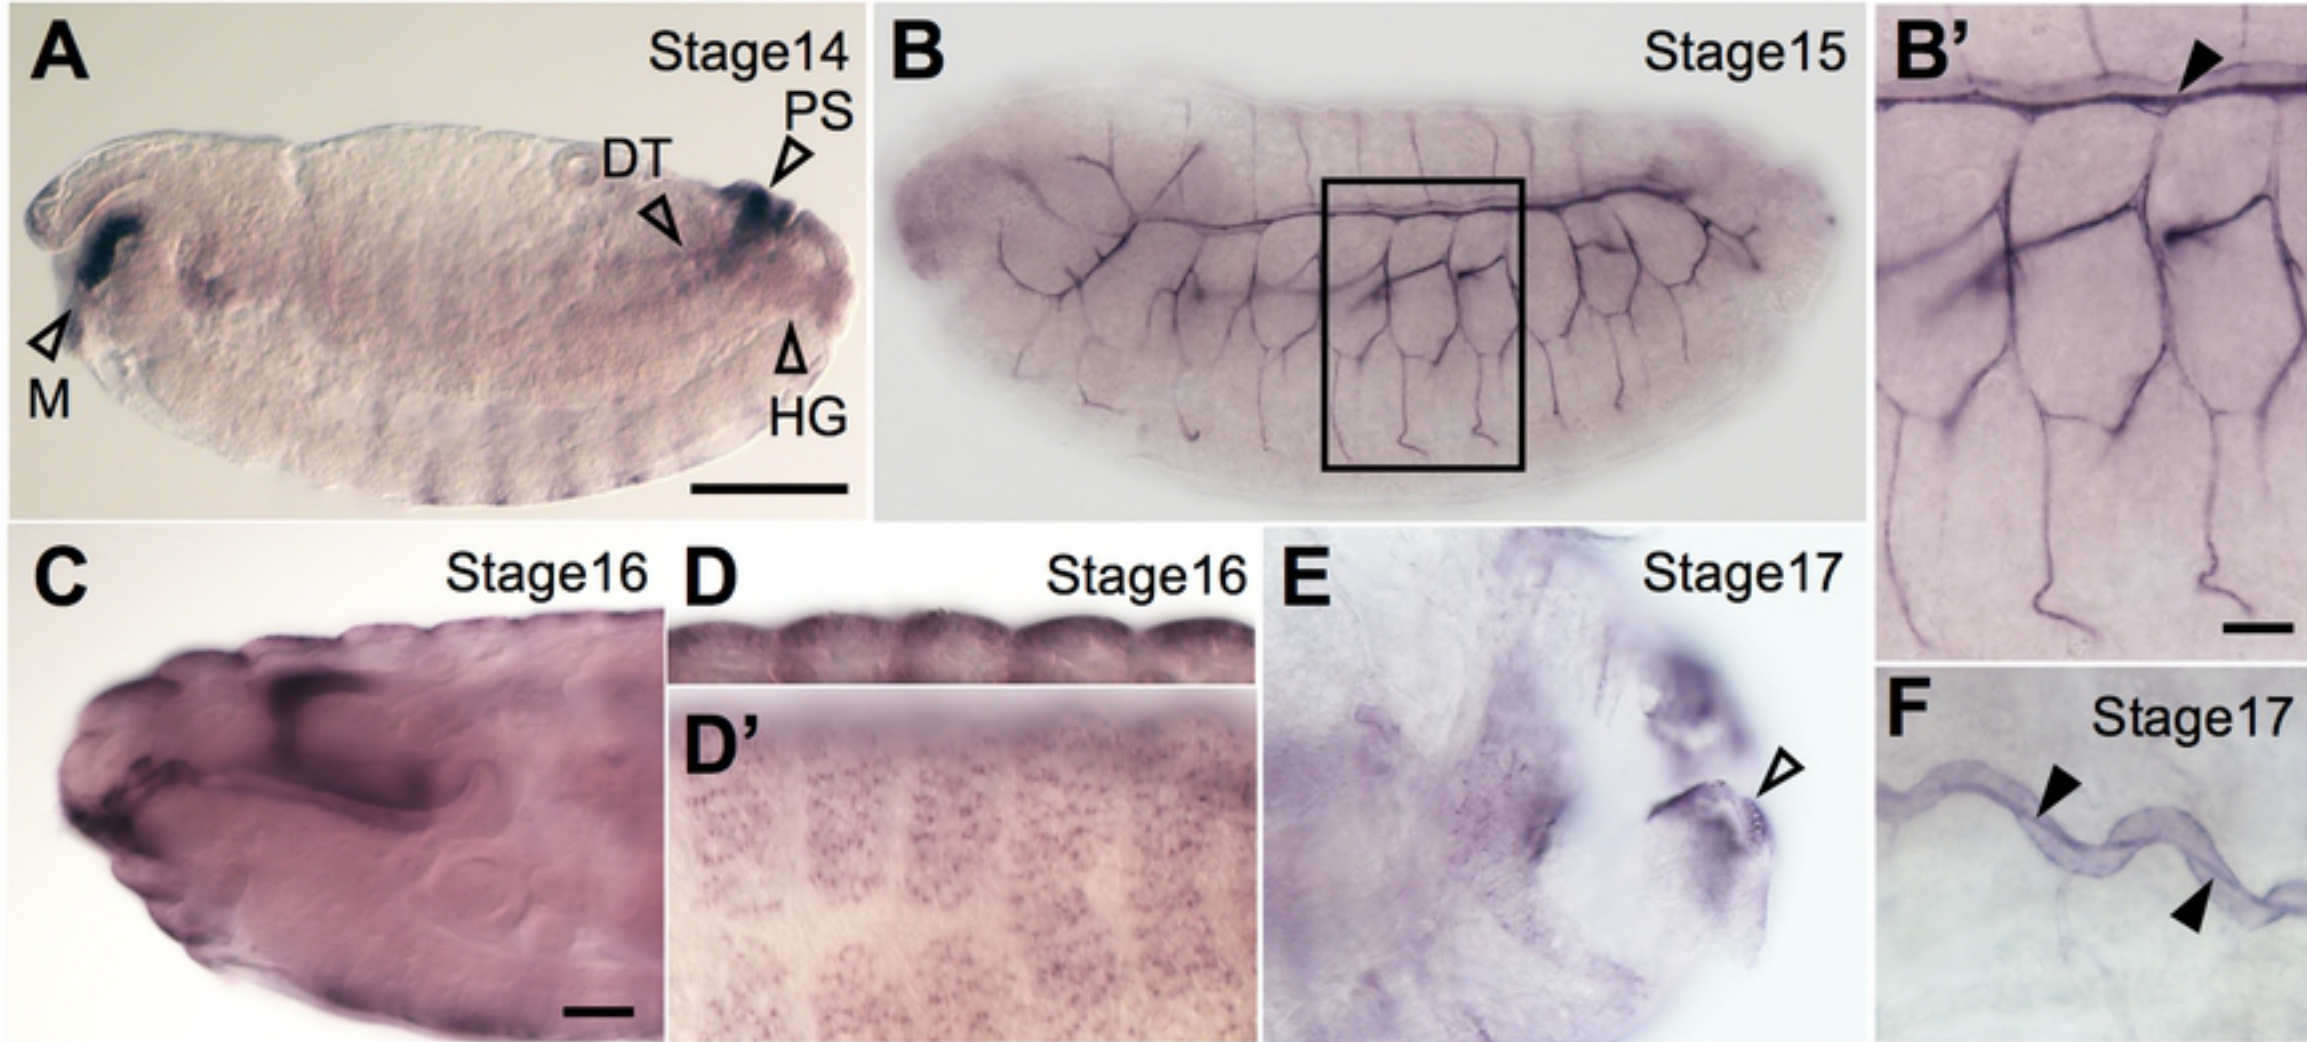

Figure 5

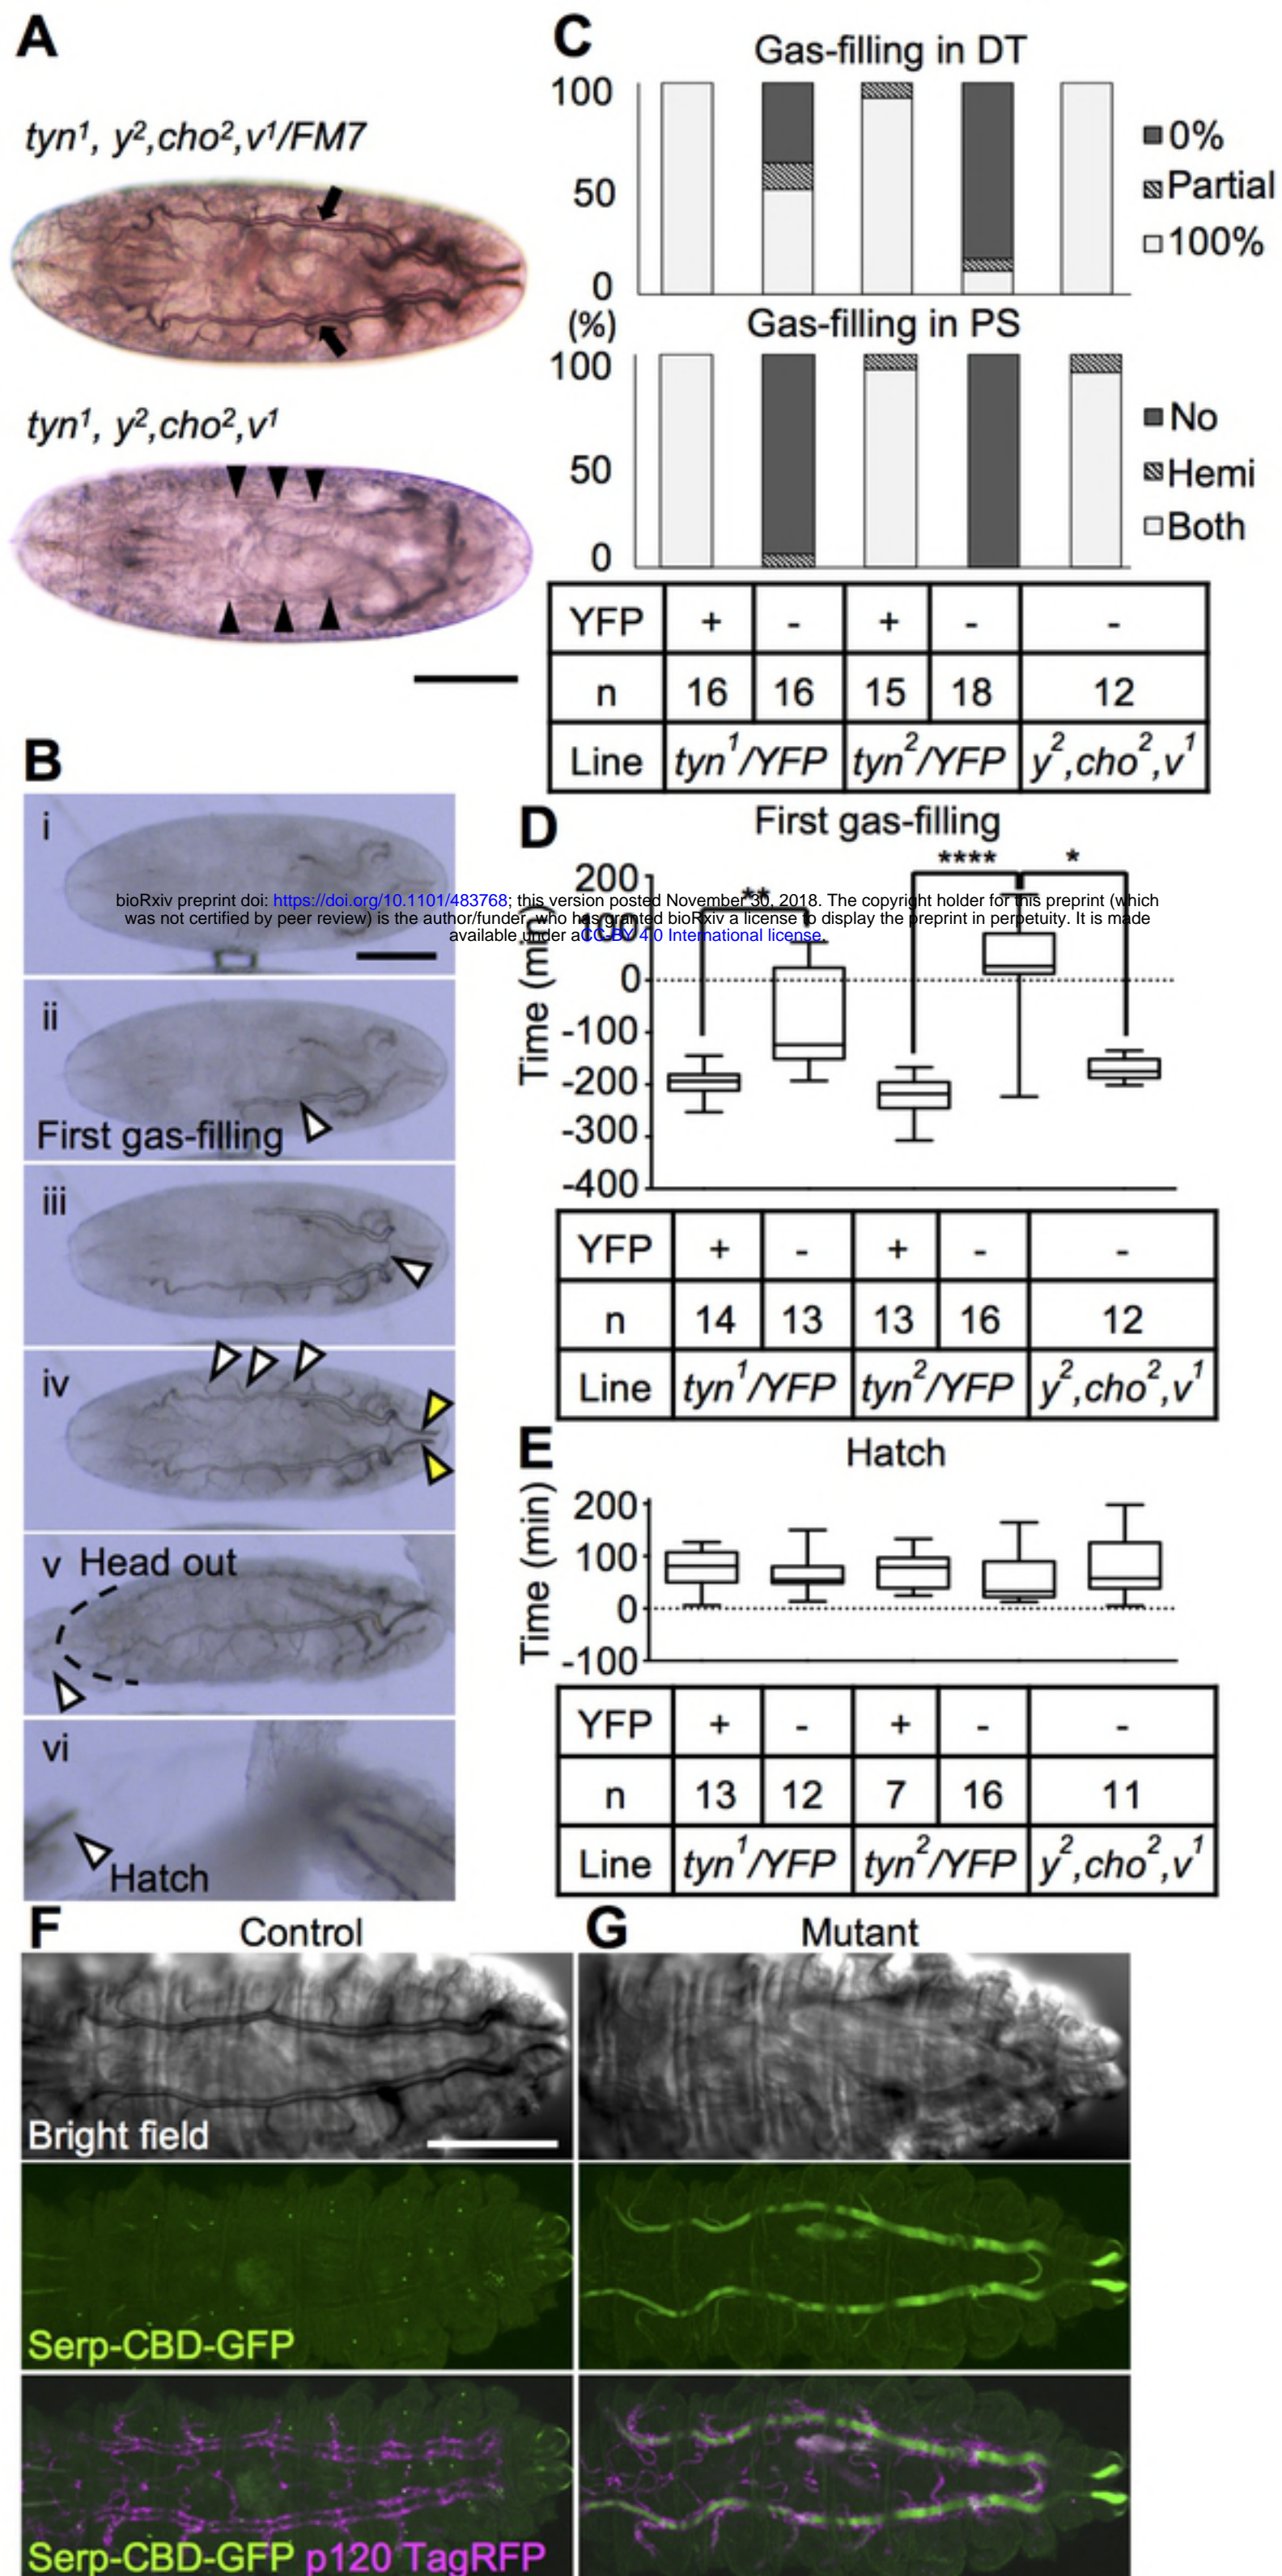

Figure 6



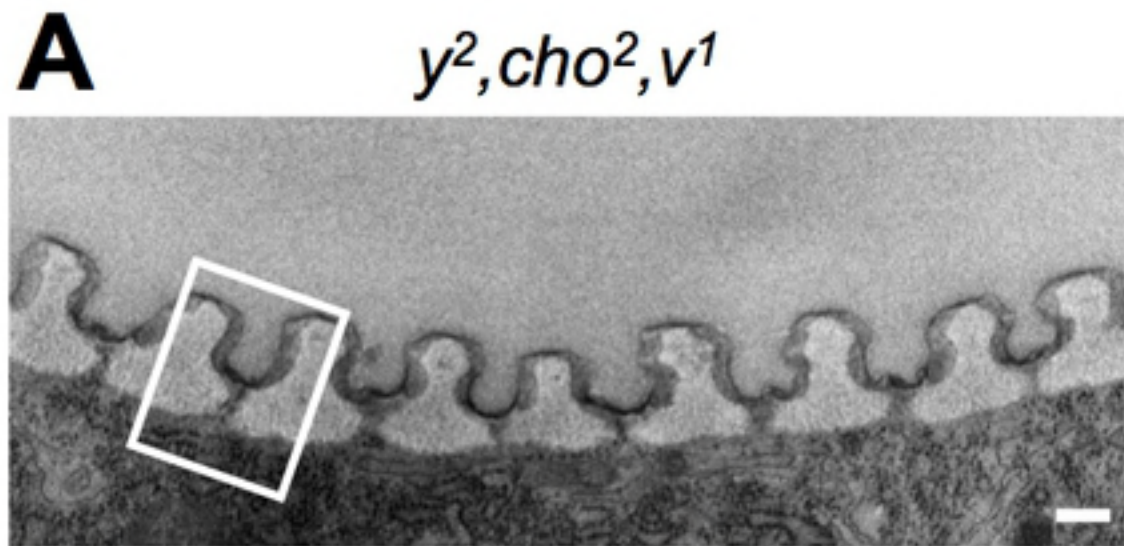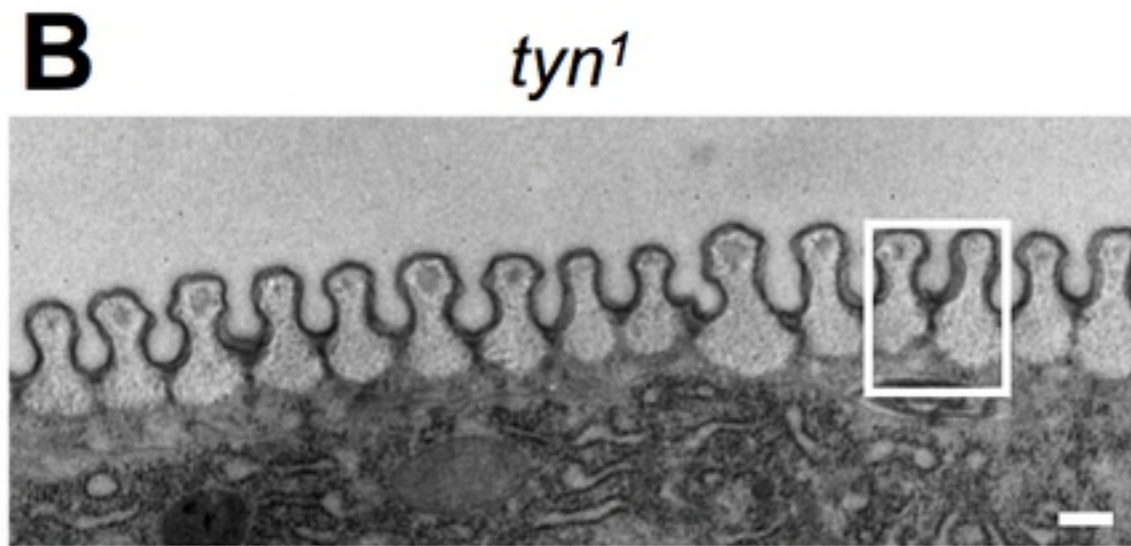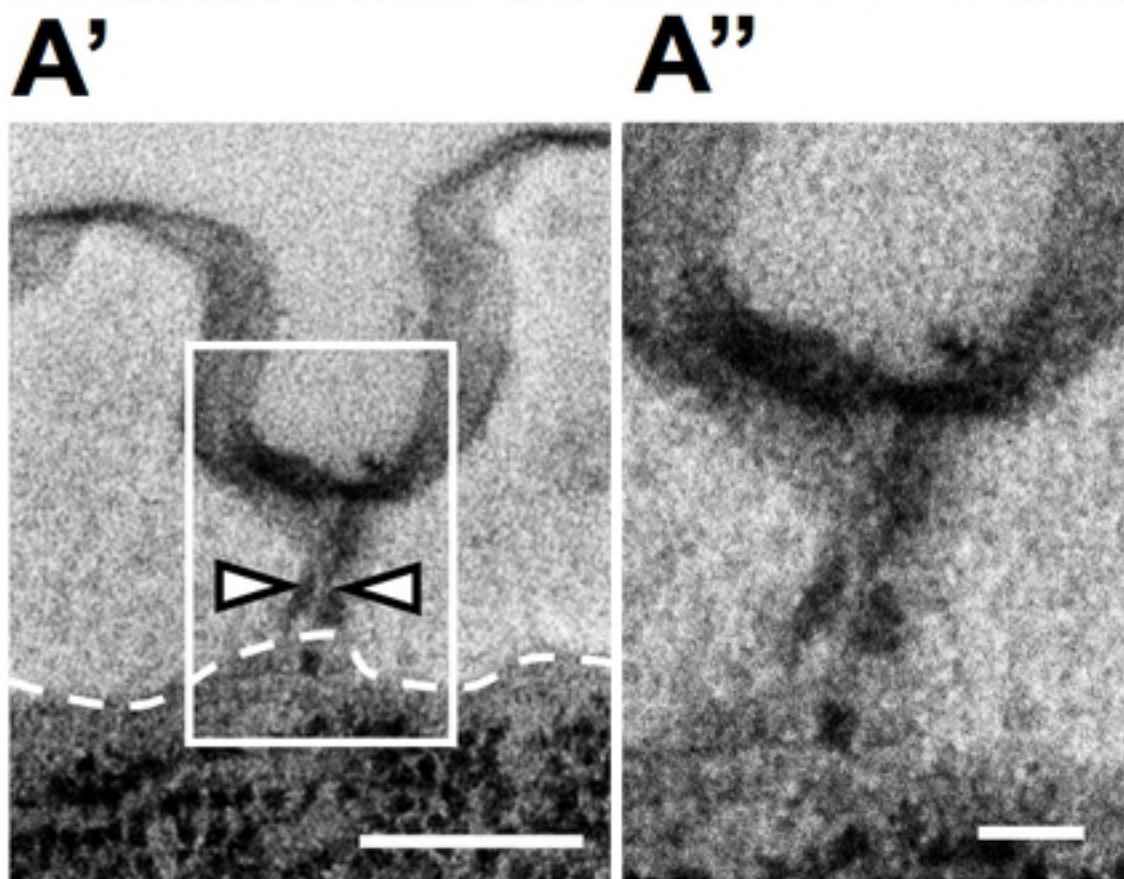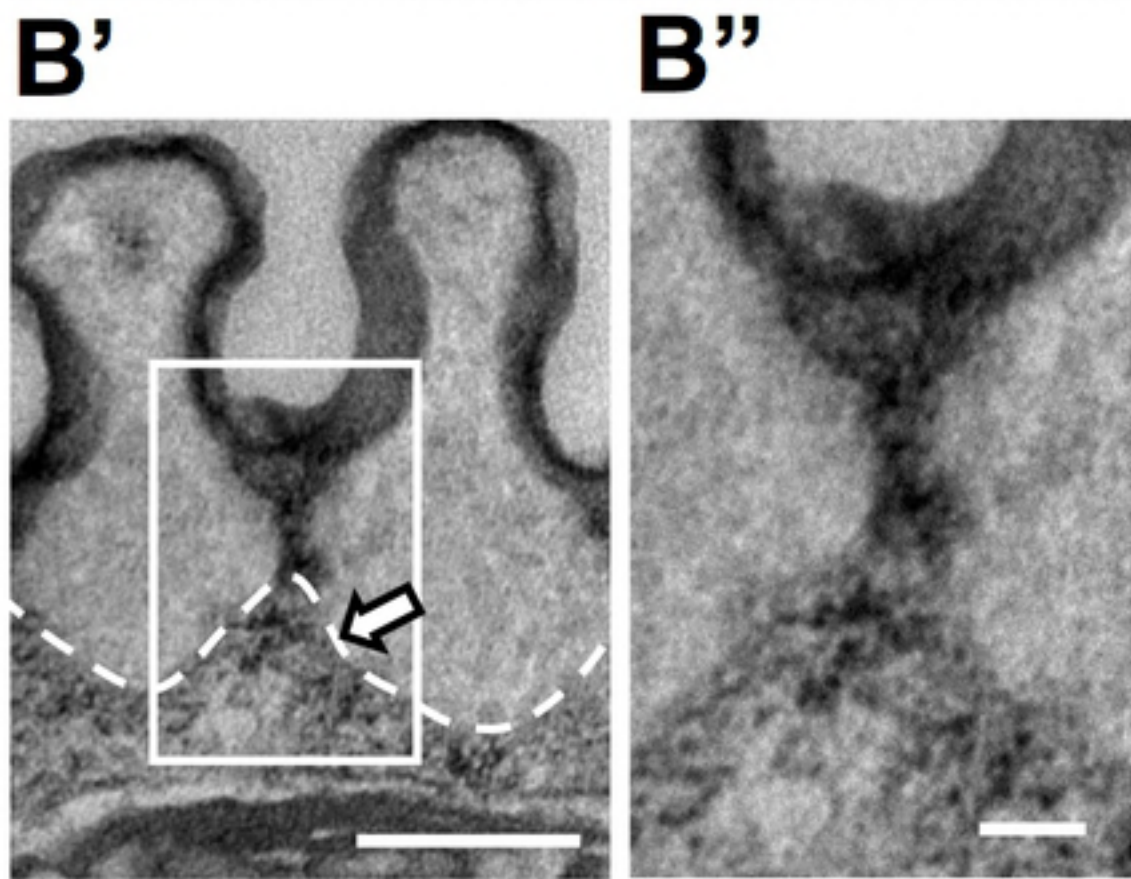

Figure 7
